1 **Full Title: Granulocyte Colony Stimulating Factor causes cerebellar deficits and anxiety in**  
2 **a mouse model of CSF-1 receptor-related leukoencephalopathy**

3

4 **Short Title: Contribution of G-CSF to mouse CRL behavioral deficits and pathology**

5

6 Fabrizio Biundo<sup>1</sup>, Violeta Chitu<sup>1</sup>, Jaafar Tindi<sup>2</sup>, Nesha S. Burghardt<sup>3</sup>, Gabriel G. L. Shlager<sup>1</sup>,  
7 Harmony C. Ketchum<sup>1</sup>, Michael A. DeTure<sup>4</sup>, Dennis W. Dickson<sup>4</sup>, Zbigniew K. Wszolek<sup>5</sup>, Kamran  
8 Khodakhah<sup>2,6,7</sup>, E. Richard Stanley<sup>1,\*</sup>

9

10 <sup>1</sup> Department of Developmental and Molecular Biology, Albert Einstein College of Medicine,  
11 Bronx, New York, USA

12 <sup>2</sup> The Dominick P. Purpura Department of Neuroscience, Albert Einstein College of Medicine,  
13 Bronx, New York, USA

14 <sup>3</sup> Department of Psychology, Hunter College, The City University of New York, New York, New  
15 York, USA

16 <sup>4</sup> Department of Neuroscience, Mayo Clinic, Jacksonville, Florida, USA

17 <sup>5</sup> Department of Neurology, Mayo Clinic, Jacksonville, Florida, USA

18 <sup>6</sup> Department of Psychiatry and Behavioral Sciences, Albert Einstein College of Medicine,  
19 Bronx, New York, USA.

20 <sup>7</sup> Saul R. Korey Department of Neurology, Albert Einstein College of Medicine, Bronx, New  
21 York, USA.

22

23

24 \* Corresponding author

25 E-mail: [richard.stanley@einsteinmed.edu](mailto:richard.stanley@einsteinmed.edu)

26

## 27 Abstract

28 Colony stimulating factor (CSF) receptor-1 (CSF-1R)-related leukoencephalopathy (CRL) is an  
29 adult-onset, demyelinating neurodegenerative disease caused by autosomal dominant mutations  
30 in *CSF1R*, modeled by the *Csf1r<sup>+/-</sup>* mouse. The expression of *Csf2*, encoding granulocyte-  
31 macrophage CSF (GM-CSF) and of *Csf3*, encoding granulocyte CSF (G-CSF), are elevated in  
32 both mouse and human CRL brains. While monoallelic targeting of *Csf2* has been shown to  
33 attenuate many behavioral and histological deficits of mouse CRL, including cognitive dysfunction  
34 and demyelination, the contribution of *Csf3* has not been explored. In this manuscript, we  
35 investigate the behavioral, electrophysiological and histopathological phenotypes of CRL mice  
36 following monoallelic targeting of *Csf3*. We show that *Csf3* heterozygosity normalized the *Csf3*  
37 levels in *Csf1r<sup>+/-</sup>* mouse brains and ameliorated anxiety-like behavior, motor coordination and  
38 social interaction deficits, but not their cognitive impairment. Consistent with this, *Csf3*  
39 heterozygosity attenuated microglial activation in the cerebellum and in the ventral but not in the  
40 dorsal hippocampus. *Csf3* heterozygosity also failed to prevent demyelination. *Csf1r<sup>+/-</sup>* mice  
41 exhibited altered synaptic activity in the deep cerebellar nuclei (DCN) associated with increased  
42 deposition of the complement factor C1q on glutamatergic synapses and with increased  
43 engulfment of glutamatergic synapses by DCN microglia. These phenotypes were significantly  
44 ameliorated by monoallelic deletion of *Csf3*. Our findings indicate that G-CSF and GM-CSF play  
45 non-overlapping roles in mouse CRL development and suggest that G-CSF could be an additional  
46 therapeutic target in CRL.

## 47 Introduction

48 *CSF1R*-related leukoencephalopathy (CRL), previously named adult-onset leukoencephalopathy  
49 with axonal spheroids and pigmented glia (ALSP), pigmentary orthochromatic leukodystrophy  
50 (POLD) and hereditary diffuse leukoencephalopathy with spheroids (HDLS), is a  
51 neurodegenerative disease characterized by progressive cognitive impairment, motor  
52 coordination deficits, and psychiatric symptoms (1, 2). CRL is caused by autosomal dominant  
53 mutations in the colony stimulating factor-1 receptor gene (*CSF1R*) that inhibit the kinase activity  
54 or abolish the expression of the mutant chain (3). Based on the finding that haploinsufficiency is  
55 sufficient for the development of CRL in humans (4), we have validated the *Csf1r*<sup>+/-</sup> mouse as a  
56 model of CRL that reproduces the neurocognitive deficits and histopathological features of the  
57 human disease (reviewed in (5)). Quantitative transcriptomic profiling of autopsied brain samples  
58 from patients with CRL revealed the loss of homeostatic microglia suggesting that CRL might be  
59 a primary microgliopathy (6, 7). This concept has been reinforced by studies in the mouse CRL  
60 model showing that *Csf1r* heterozygosity in microglia was sufficient to reproduce all aspects of  
61 disease (8). In a screen for inflammatory cytokines, chemokines and receptors that could  
62 contribute to disease we found that the mRNAs for *Csf2*, encoding granulocyte-macrophage CSF  
63 (GM-CSF) and for *Csf3*, encoding granulocyte CSF (G-CSF), were uniquely elevated in the brains  
64 of *Csf1r*<sup>+/-</sup> mice (9). Elevation of *CSF2* expression in CRL patient brains (10) and the identification  
65 of gene expression changes consistent with altered G-CSF signaling (6, 7) suggested that both  
66 GM-CSF and G-CSF may also contribute to the development of this disease. Notably, while the  
67 expression of transcripts for both growth factors is barely detectable in normal brains, they can  
68 be rapidly induced by a variety of inflammatory stimuli, tissue injury and neurotoxins and signal in  
69 microglia to promote functional changes (reviewed in (11)). GM-CSF is a microglial mitogen (12,  
70 13) that promotes a demyelinating phenotype in microglia (14), while G-CSF induces a pro-  
71 oxidant phenotype (15).

72 Genetic targeting in the mouse CRL model revealed that *Csf2* was responsible for the  
73 cognitive and olfactory deficits of *Csf1r<sup>+/-</sup>* mice and for callosal demyelination and atrophy (10).  
74 Furthermore, gene expression profiling of isolated forebrain microglia revealed maladaptive  
75 functions of *Csf1r<sup>+/-</sup>* microglia and activation of pathways triggering oxidative stress that were  
76 relieved by monoallelic *Csf2* deletion (10). However, although targeting *Csf2* improved  
77 coordination on the balance beam, it did not resolve the ataxic behavior in female mice or  
78 cerebellar microgliosis (10).

79 In the present study, we have explored the role of G-CSF in CRL pathology. We show that  
80 *CSF3* mRNA is also elevated in CRL patient brains and that the elevation of *Csf3* mRNA in the  
81 *Csf1r<sup>+/-</sup>* CRL mouse can be normalized by monoallelic *Csf3* deletion. In contrast to *Csf2*  
82 heterozygosity, monoallelic targeting of *Csf3* failed to prevent the cognitive deficits, callosal  
83 microgliosis and demyelination in the brains of CRL mice. However, *Csf3* heterozygosity  
84 attenuated the anxiety-like behavior, motor coordination and social novelty deficits of CRL mice.  
85 Consistent with these effects, monoallelic targeting of *Csf3* reduced microglial activation in  
86 cerebellum and ventral hippocampus, two brain regions involved in motor coordination and  
87 anxiety, respectively (16, 17). *Csf1r<sup>+/-</sup>* mice exhibited altered electrophysiological responses in the  
88 deep cerebellar nuclei (DCN) that were associated with increased expression and deposition of  
89 the C1q factor of the complement cascade on glutamatergic synapses and their increased  
90 engulfment by DCN microglia. All these phenotypes were attenuated in *Csf1r<sup>+/-</sup>; Csf3<sup>+/-</sup>* mice.  
91 Together, our data suggest that in CRL, increased G-CSF promotes anxiety and cerebellar  
92 dysfunction by activating discrete populations of microglia and acts in a non-overlapping manner  
93 with GM-CSF to promulgate the disease.

94

## 95 Results

### 96 **Csf3 expression is elevated in mouse and human CRL brains and normalized in mice by Csf3** 97 **heterozygosity**

98 In a previous study, we observed an increased expression of *Csf3* in brains of pre-symptomatic  
99 *Csf1r<sup>+/-</sup>* CRL mice. The elevation of *Csf3* became more pronounced in aged mice exhibiting  
100 behavioral deficits suggesting a role for G-CSF in the CRL phenotype (9). To investigate whether  
101 *CSF3* expression was increased in CRL patients, we quantified the levels of *CSF3* mRNA in  
102 brains of CRL patients by qPCR. Consistent with the results detected in the mouse model, the  
103 levels of *CSF3* transcripts were significantly higher in CRL than in control brains (Fig. 1A). These  
104 results prompted us to generate and characterize an experimental cohort of mice including mice  
105 in which either one allele of *Csf1r* or of *Csf3* was deleted (*Csf1r<sup>+/-</sup>*, *Csf3<sup>+/-</sup>*), double mutants (*Csf1r<sup>+/-</sup>*  
106 ;*Csf3<sup>+/-</sup>*, referred to as *Dhet*) and wild type (*wt*) controls. Measurement of *Csf3* expression showed  
107 that the elevated *Csf3* mRNA levels observed in *Csf1r<sup>+/-</sup>* mice were normalized by *Csf3*  
108 monoallelic deletion (Fig. 1B).

109

110 **Figure 1. Csf3 heterozygosity attenuates anxiety and motor coordination deficits in CRL mice but**  
111 **fails to improve cognition.**

112 **(A)** Elevated expression of *CSF3* in CRL patients versus healthy controls (unpaired t test). **(B)**  
113 Expression of *Csf3* in brains of *wt* and mutant mice (unpaired t test). **(C-F)** Evaluation of cognitive  
114 flexibility in 7- month-old mice (females plus males). **(C)** Schematic of the protocol used for active  
115 place avoidance testing. Day 1 (habituation) is not shown. **(D)** Days 2-4: Training to avoid the  
116 initial shock zone location. **(E, F)** Evaluation of long-term memory three days after the last training  
117 trial **(E)**. Evaluation of cognitive flexibility after the location of the shock zone was switched **(F)** at  
118 day 7 (uncorrected Dunn's test). **(G-J)** Assessment of short-term memory at 11.5 months of age  
119 in the Y-maze. **(G, H)**, females; **(I, J)**, males. **(G, I)** Comparable total exploratory activity among  
120 genotypes. **(H, J)** Exploratory preference for the novel arm (Tukey's). **(K, L)** Assessment of long-

121 term memory in the object placement test (females plus males). **(K)** Ratio of the time exploring  
122 the left vs right position of the objects during training. **(L)** Discriminatory ratio of the time exploring  
123 the displaced vs the non-displaced object during testing (Fisher's). **(M, N)** Assessment of anxiety-  
124 like behavior for females **(M)** and males **(N)** in the elevated zero maze (Bonferroni's). **(O, P)**  
125 Measurement of motor coordination on the balance beam (Fisher's). Means  $\pm$  SEM, significantly  
126 different changes are marked by asterisks. \*,  $p < 0.05$ ; \*\*,  $p < 0.01$ ; \*\*\*,  $p < 0.001$ , \*\*\*\*,  $p < 0.0001$ .  
127 The statistical test used in each panel is indicated in parenthesis in the corresponding description.  
128 RI, retention interval. Data underlying this figure can be found in Table S1.

129

130 **Csf3 heterozygosity fails to prevent the cognitive deficits of CRL mice but attenuates anxiety-like**  
131 **behavior and the motor coordination deficits**

132 To assess the contribution of the increased *Csf3* expression to the behavioral deficits of *Csf1r*<sup>+/-</sup>  
133 mice, the experimental cohort was evaluated for cognitive flexibility, spatial memory, anxiety, and  
134 motor coordination.

135 Cognitive flexibility, defined as the ability to change and adapt behavior in response to  
136 new environmental stimuli (18), is one of the executive functions affected in early stages of  
137 Alzheimer's disease (19) and deficits were also recently reported in a case of CRL (20). Cognitive  
138 flexibility was evaluated in 7-month-old mice using the active place avoidance test (Fig. 1C) (21).  
139 Regardless of genotype, all mice had the same propensity to avoid the shock zone three days  
140 after the last training trial (Fig. 1D, E). These data indicate that at this young age, there are no  
141 significant long-term memory deficits associated with *Csf1r* and/or *Csf3* heterozygosity. However,  
142 when the location of the shock zone was switched, all mice carrying mutations entered the new  
143 shock zone significantly more than wt mice, demonstrating that either single or combined *Csf1r*  
144 and *Csf3* deficiencies impair cognitive flexibility (Fig. 1F).

145 The effects of *Csf3* heterozygosity on short- and long-term spatial memory were tested in  
146 aged (11.5 month-old) mice, in the Y-maze and object placement tasks, respectively (Fig. 1G-M).

147 All mutant mice (*Csf1r*<sup>+/-</sup>, *Csf3*<sup>+/-</sup> and *Dhet*) exhibited a short-term memory deficit as shown by  
148 their loss of preference for the novel arm of the Y-maze (Fig. 1H, J). The absence of differences  
149 in total number of arm entries indicated that the differences in cognitive performance did not result  
150 from different propensities among groups to explore of the apparatus (Fig. 1G, I).

151 Similarly, in the object placement test, all mutant mice showed no preference towards  
152 exploring the displaced object versus the non-displaced object, indicative of a long-term memory  
153 deficit (Fig. 1L). The absence of differences in time exploring the two initial positions of the objects  
154 during training indicated that the cognitive deficits detected during testing were not due to a  
155 preferential exploration of one of the sides of the chamber (Fig. 1K).

156 Mice were tested for anxiety-like behavior in the elevated zero maze at the age of 12  
157 months (Fig. 1M, N). The time spent in the open zone of the circular apparatus was used as an  
158 index inversely related to anxiety-like behavior. Deficits observed in female *Csf1r*<sup>+/-</sup> mice (Fig. 1M)  
159 were prevented by *Csf3* heterozygosity, while no significant differences among the genotypes  
160 were detected in males ((Fig. 1N).

161 Motor coordination was analyzed at the age of 12 months using the balance beam test  
162 (Fig. 1O, P). The deficits observed in female *Csf1r*<sup>+/-</sup> mice were rescued by single-allele deletion  
163 of *Csf3* (Fig. 1O), while no significant differences were observed in males (Fig. 1P). Thus, *Csf3*  
164 heterozygosity fails to prevent the cognitive deficits of *Csf1r*<sup>+/-</sup> mice, but significantly attenuates  
165 the anxiety and loss of motor coordination observed in females.

166

### 167 ***Csf3* heterozygosity reduces microglial activation in the ventral but not dorsal hippocampus of CRL** 168 **mice**

169 The dorsal hippocampus plays a critical role in cognition while the ventral hippocampus relates to  
170 emotions and stress (22). Previous studies have shown that dysregulation of *Csf1r* signaling in  
171 microglia of CRL mice leads to low grade microgliosis in multiple regions of the brain, including  
172 the dorsal hippocampus (8, 10) and administration of recombinant G-CSF was reported to

173 increase the number of microglia and their activation *in vivo* (15, 23). To test whether G-CSF  
174 regulates microglial activation in the hippocampus, we analyzed microglia densities and  
175 morphology in 16-month-old mice (Fig. 2). Iba1 staining revealed that microglial densities were  
176 significantly increased in the dorsal hippocampi of *Csf1r<sup>+/-</sup>* mice, and that *Csf3* heterozygosity  
177 failed to attenuate this increase (Fig. 2A - upper panels and Fig. 2B), yet there were no significant  
178 differences in microglial densities in the ventral hippocampus (Fig. 2A - lower panels, Fig. 2C).  
179 Interestingly, while the branching and length of microglial processes did not vary with genotype in  
180 the dorsal hippocampus (Fig. 2D – right panels, Fig. 2E), both the branching and length of  
181 microglial processes were decreased in the ventral hippocampus of *Csf1r<sup>+/-</sup>* mice (Fig. 2D – left  
182 panels, Fig. 2F), indicative of an activated state. Monoallelic deletion of *Csf3* restored process  
183 branching, albeit it had no significant effect on process length (Fig. 2F). These data are consistent  
184 with a contribution of G-CSF-induced microglial activation to the development of anxiety-like  
185 behavior, but not to the cognitive deficits in *Csf1r<sup>+/-</sup>* mice (Fig. 1C-M).

186

187 **Figure 2. *Csf3* heterozygosity reduces microglial activation in the ventral hippocampus of CRL mice.**

188 **(A)** Iba1<sup>+</sup> cell densities (green) in dorsal hippocampus (DH) and ventral hippocampus (VH) of 16-  
189 month-old female mice (scale bar, 100  $\mu$ m). **(B, C)** Quantification of microglial densities in the DH  
190 (B) and VH (C), 3-8 mice per genotype) (Fisher's). **(D)** Morphology of the microglial ramifications  
191 in the dorsal and ventral hippocampus (scale bar, 50  $\mu$ m). **(E, F)** Quantitation of the ramifications  
192 in DH **(E)** and VH **(F)**, 3-6 mice per genotype. (Two-stage linear step-up procedure of Benjamini,  
193 Krieger and Yekutieli). Means  $\pm$  SEM, significantly different changes are marked by asterisks. \*,  
194  $p < 0.05$ ; \*\*,  $p < 0.01$ ; \*\*\*\*,  $p < 0.0001$ . Data underlying this figure can be found in Table S1.

195

196

197 ***Csf3* heterozygosity fails to prevent microglial activation, callosal demyelination and**  
198 **neurodegeneration in the motor cortex of CRL mice**



199 Previous studies have shown that dysregulation of CSF-1R signaling in microglia of CRL mice  
200 promotes callosal demyelination and the loss of layer V neurons in the motor cortex (10). To test  
201 whether G-CSF plays a role in microglial activation in the corpus callosum, we analyzed microglia  
202 density and morphology in 16-month-old CRL and *wt* control mice. Consistent with the previously  
203 published data (10), analysis of multiple sagittal brain sections detected a significant elevation in  
204 the total number of microglia and in the number of sections with supraventricular microglial  
205 patches in the corpus callosum of *Csf1r<sup>+/-</sup>* compared to *wt* mice (Fig. 3A, B). Although *Csf3*  
206 heterozygosity reduced the total number of microglia, it did not significantly reduce their  
207 propensity to cluster (Fig. 3B, right panel) and failed to prevent the shortening of their processes  
208 and the loss of process branching (Fig. 3C, D). The presence of clusters of activated microglia  
209 has recently been correlated with the active clearing of degenerated myelin (24). Consonant with  
210 its inability to reduce microglial clustering and activation, *Csf3* heterozygosity also failed to  
211 attenuate callosal demyelination (Fig. 3E, F). Furthermore, histological evaluation of the motor  
212 cortex revealed that although *Csf3* heterozygosity attenuated the shortening of cortical microglia  
213 processes, it failed to attenuate their expansion in the motor cortex (Fig. 3 G-J). Consistent with  
214 this, *Csf3* heterozygosity also failed to prevent the loss of Layer V neurons (Fig. 3K, L). These  
215 data indicate that, although G-CSF may regulate some aspects of callosal and cortical microglia  
216 activation, its actions do not contribute significantly to callosal demyelination or to  
217 neurodegeneration in the motor cortex.

218

219 **Figure 3. *Csf3* heterozygosity does not prevent microglial activation in the corpus callosum or**  
220 **motor cortex, nor callosal demyelination or cortical neuronal loss, in CRL mice.**

221 **(A)** Iba1<sup>+</sup> cell densities (green) in the supraventricular area of corpus callosum (scale bar, 100  
222 μm). **(B)** Quantification of microglial densities (left panel) and percentage of sections with  
223 microglial patches (right panel) (6-8 mice per genotype) (Fisher's). Morphology **(C)** and  
224 morphometric analysis **(D)** of microglia in corpus callosum (scale bar, 50 μm) (4-6 mice per

225 genotype) (Two-stage linear step-up procedure of Benjamini, Krieger and Yekutieli). Fluoromyelin  
226 staining (**E**) and fluorescence quantification (**F**) in corpus callosum (scale bar, 100  $\mu$ m) (6-8 mice  
227 per genotype) (Tukey's). Iba1<sup>+</sup> cell densities (green) (**G**) and quantification (**H**) in the motor cortex  
228 (scale bar, 100  $\mu$ m) (7-8 mice per genotype) (Fisher's). Morphology (**I**) and morphometry (**J**) of  
229 microglia in the motor cortex (scale bar, 50  $\mu$ m) (4-6 mice per genotype) (Two-stage linear step-  
230 up procedure of Benjamini, Krieger and Yekutieli). NeuN<sup>+</sup> neurons (**K**) and quantification (**L**) of  
231 their distribution in the cortical layers of the motor cortex (scale bar, 100  $\mu$ m) (5 mice per genotype)  
232 (Fisher's). All experiments were performed in 16-month-old female mice. Means  $\pm$  SEM,  
233 significantly different changes are marked by asterisks. \*,  $p < 0.05$ ; \*\*,  $p < 0.01$ . Data underlying  
234 this figure can be found in Table S1.

235

### 236 **Csf3 heterozygosity prevents microglial activation in the cerebellum**

237 In addition to the corpus callosum and the motor cortex, the cerebellum plays an important role in  
238 motor coordination. This prompted us to analyze the impact of *Csf3* heterozygosity on microglia  
239 density and activation in the cerebellum. Analysis of the cerebellar cortex and deep cerebellar  
240 nuclei revealed an increase in the number of Iba1<sup>+</sup> microglial cells detected in the cerebellar cortex  
241 of *Csf1r*<sup>+/-</sup> mice compared to *wt* mice. This was attenuated by monoallelic deletion of *Csf3* (Fig.  
242 4A, B). In contrast, no differences in microglia densities were detected in the dorsal protuberance  
243 of the medial cerebellar nucleus (MedDL), and the interposed cerebellar nuclei (Int) (Fig. 4A, B).  
244 Morphometric analysis revealed an increase in microglia activation in *Csf1r*<sup>+/-</sup> mice in all the areas  
245 of the cerebellum that was prevented by *Csf3* monoallelic deletion (Fig. 4C-right panels and Fig.  
246 4D, F-H). Furthermore, *Csf3* heterozygosity also reduced the extent of microglia contacts with the  
247 Purkinje cell somas (Fig. 4C- left panels and Fig. 4E). These data indicate that G-CSF mediates  
248 the activation of cerebellar microglia in *Csf1r*<sup>+/-</sup> mice.

249 Deletion of *Csf1* in the Nestin<sup>+</sup> neural lineage, resulting in CSF1R signaling deficiency in  
250 the cerebellum, was associated, not only with alterations of cerebellar microglia homeostasis, but  
251 also with decreased Purkinje cell (PC) numbers (25). Furthermore, a reduction of PC number was  
252 also documented in *Csf1<sup>op/op</sup>* mice with global *Csf1* deficiency (26). These findings, together with  
253 our observation that G-CSF contributes to the activation of cerebellar microglia, prompted us to  
254 explore how *Csf1r* and/or *Csf3* heterozygosities impact PC number (Fig. 4 I-K). Neither the total  
255 numbers of Calbindin<sup>+</sup> PC cells (Fig. 4J) nor their distribution in each lobule of the cerebellar  
256 cortex (Fig. 4K) were significantly different in mice carrying single or compound mutations in *Csf1r*  
257 and *Csf3*.

258 Together, these data indicate that, although *Csf1r* heterozygosity does not cause the loss  
259 of Purkinje cells, it promotes the activation of cerebellar microglia in a G-CSF-dependent manner.  
260

261 **Figure 4. *Csf3* heterozygosity reduces microglial activation in the cerebellum of CRL mice.**

262 **(A)** Iba1<sup>+</sup> cell densities (green) in the cerebellar cortex (Cb cx) and deep cerebellar nuclei (MedDL,  
263 dorsal protuberance of the medial cerebellar nucleus; Int, interposed nucleus) of 16-month-old  
264 female mice (scale bar, 100 μm). **(B)** Quantification of data in **(A)** (6-8 mice per genotype)  
265 (Bonferroni's). **(C-E)** Imaging **(C** -left panels) and quantitation **(E)** of microglia contacts with the  
266 Purkinje cell somas and morphology **(C** -right panels) and morphometry **(D)** of microglia (red) in  
267 the cerebellar cortex of 16-month-old female mice (4-5 mice per genotype) (Dunn's) (scale bar,  
268 15 μm). **(F-H)** Morphology **(F)** and morphometry **(G, H)** of microglia in the deep cerebellar nuclei  
269 of 16-month-old female mice (scale bars, 50 μm and 70 μm respectively) (4-5 mice per genotype)  
270 (Dunn's, and Tukey's). **(I)** Representative images of Calbindin<sup>+</sup> Purkinje cells (PC) distributed in  
271 the cerebellar lobules **(J)** Quantification of the total number PC per section. **(K)** Quantification of  
272 the number of Calbindin<sup>+</sup> PCs in each lobule (4-5 mice per genotype) (scale bar, 500 μm). Means

273 ± SEM, significantly different changes are marked by asterisks. \*,  $p < 0.05$ ; \*\*,  $p < 0.01$ . Data  
274 underlying this figure can be found in Table S1.

275

### 276 **Csf3 heterozygosity prevents deficits in social novelty**

277 Aside from its role in motor coordination, the cerebellum is involved in regulation of aspects of  
278 social behavior (27). Both direct genetic disruption of Purkinje cell activity (28) and disruption of  
279 cerebellar microglia homeostasis in mice with neural-lineage specific deletion of *Csf1* (25) cause  
280 autistic-like behavior manifested as a loss of social novelty preference. This prompted us to  
281 investigate how decreased CSF-1R and/or G-CSF signaling impact social behavior. Using the  
282 three-chamber sociability paradigm for social preference and social novelty (Fig. 5A) we found  
283 that all mutant mouse groups exhibited normal social preference spending significantly more time  
284 interacting with another mouse than with an object (Fig. 5B). In contrast, *Csf1r*<sup>+/-</sup> mice showed a  
285 clear loss of social novelty, failing to preferentially interact with the novel mouse in comparison to  
286 the familiar mouse. This phenotype was prevented by monoallelic targeting of *Csf3* (Fig. 5C).  
287 These data suggest that G-CSF may contribute to the development of social interaction deficits  
288 in *Csf1r*<sup>+/-</sup> mice by impairing cerebellar function.

289

### 290 **Figure 5. Evaluation of social interaction in the three-chamber sociability paradigm.**

291 **(A)** Schematic of the testing apparatus. Assessment of social preference **(B)** and social novelty  
292 **(C)** in the three chamber sociability paradigm. Combined female and male data. Means ± SEM,  
293 significantly different changes are marked by asterisks. \*,  $p < 0.05$ ; \*\*\*\*,  $p < 0.0001$  (Holm-  
294 Sidak's). Data underlying this figure can be found in Table S1.

295

296 **Csf3 heterozygosity prevents the development of electrophysiological alterations in the deep**  
297 **cerebellar nuclei of *Csf1r*<sup>+/-</sup> mice**

298 The attenuation of microglia density and activation in the cerebellar regions analyzed (Fig. 4)  
299 together with the correction of the cerebellum-dependent behaviors by *Csf3* heterozygosity (Fig.  
300 1O and Fig. 5) suggested that G-CSF may play a role in microglia-mediated alteration of  
301 cerebellar physiology. To test this hypothesis, we analyzed the firing properties of PC and DCN.  
302 *In vivo* single cell unit recording of PCs (Fig. 6 A-E) and DCN cells (Fig. 6 F-J), revealed a  
303 differential effect of *Csf1r* heterozygosity. Electrophysiological recordings of the activity of Purkinje  
304 cells in awake, head-restrained mice revealed no difference in average firing rate (FR),  
305 predominant FR and inter-spike interval coefficient of variation (ISI CV) between *wt* and *Csf1r*<sup>+/-</sup>  
306 mice (Fig. 6 A- E). In contrast, recordings in the DCN revealed a significant decrease in  
307 predominant FR in *Csf1r*<sup>+/-</sup> mice that was normalized when one allele of *Csf3* was removed (Fig.  
308 6 F-J). These data indicate that G-CSF mediates the disruption of DCN firing properties in CRL  
309 mice.

310

311 **Figure 6. *Csf3* heterozygosity rescues the altered firing of deep cerebellar nuclei (DCN) cells in CRL**  
312 **mice.**

313 **(A)** Schematic of awake head-restrained *in vivo* single unit electrophysiological recording of  
314 cerebellar Purkinje cell (PC) activity. **(B)** Example recordings of PCs from *wt* (top left) and *Csf1r*<sup>+/-</sup>  
315 mice (top right). **(C-E)** Quantification of average firing rate (FR) **(C)**, predominant FR **(D)** and inter-  
316 spike interval coefficient of variation (ISI CV) **(E)** of sorted single units from *wt* (n = 19 cells, 3  
317 mice) and *Csf1r*<sup>+/-</sup> (15 cells, 4 mice). **(F)** Schematic of *in vivo* single unit electrophysiological  
318 recording of DCN cell activity. **(G)** Example recordings of DCN cells from *wt* (top left), *Csf1r*<sup>+/-</sup> (top  
319 right), *Dhet* (bottom left) and *Csf3*<sup>+/-</sup> mice (bottom right). **(H-J)** Quantification of FR **(H)**,  
320 predominant FR **(I)** and ISI CV **(J)** of sorted single units/cells from *wt* (n = 32 cells, 5 mice), *Csf1r*<sup>+/-</sup>  
321 (31 cells, 4 mice), *Dhet* (17 cells, 3 mice) and *Csf3*<sup>+/-</sup> (25 cells, 4 mice). Means ± SEM, significantly  
322 different changes are marked by asterisks. \*, p < 0.05; \*\*, p < 0.01 (Fisher's). Data underlying this  
323 figure can be found in Table S1.

324

325 **Csf3 heterozygosity prevents the excessive elimination of glutamatergic synapses in the deep**  
326 **cerebellar nuclei of *Csf1r*<sup>+/-</sup> mice**

327 Single cell transcriptome profiling experiments of mouse cerebelli detect *Csf3r* transcripts in  
328 microglia while the expression in neural lineage cells, including Purkinje cells, is sporadic, at best  
329 (29) (databases available at: [https://singlecell.broadinstitute.org/single\\_cell/study/SCP795/a-](https://singlecell.broadinstitute.org/single_cell/study/SCP795/a-transcriptomic-atlas-of-the-mouse-cerebellum?genes=Csf3r#study-visualize)  
330 [transcriptomic-atlas-of-the-mouse-cerebellum?genes=Csf3r#study-visualize](https://singlecell.broadinstitute.org/single_cell/study/SCP795/a-transcriptomic-atlas-of-the-mouse-cerebellum?genes=Csf3r#study-visualize)). Microglia play a  
331 pivotal role in remodeling neuronal networks by pruning or eliminating synapses during  
332 development and in adult life (30, 31). To investigate whether G-CSF-activated microglia may  
333 contribute to aberrant synapse pruning in the DCN of *Csf1r*<sup>+/-</sup> mice, we quantified the  
334 colocalization of microglia with synaptic markers of glutamatergic (VGLUT2<sup>+</sup>) and of GABAergic  
335 (GAD67<sup>+</sup>) neurons, the two prevailing neuronal populations in the DCN (32). While the percentage  
336 of GAD67<sup>+</sup> puncta colocalized with Iba1<sup>+</sup> microglia cells was comparable among all genotypes  
337 (Fig. 7 A, B), the percentage of VGLUT2<sup>+</sup> puncta colocalized within Iba1<sup>+</sup> microglial cells was  
338 significantly higher in the DCN of *Csf1r*<sup>+/-</sup> mice and was normalized by *Csf3* heterozygosity (Fig.  
339 7 A, C). Three-dimensional reconstruction, revealed the presence of VGLUT2<sup>+</sup> puncta in both the  
340 branches and the cell body of single microglial cells (Fig. 7A, lower panels), confirming the  
341 engulfment of synaptic material.

342

343 **Figure 7. G-CSF mediates excessive complement-mediated engulfment of DCN glutamatergic**  
344 **synapses by microglia in CRL mice.**

345 **(A)** Upper panels, immunofluorescence staining showing the colocalization of GAD67<sup>+</sup> and  
346 VGLUT2<sup>+</sup> (red) with microglia (green) in the DCN of 16-month-old female mice. Lower panels, 3D  
347 reconstruction with surface rendering showing VGLUT2<sup>+</sup> puncta inside selected individual  
348 microglia shown in their original position (top) and rotated 180 degrees along the z axis (bottom).  
349 Scale bars: 30  $\mu$ m (upper panels), 5  $\mu$ m (lower panels). **(B-C)** Quantification of the percentage of

350 GAD67<sup>+</sup> and VGLUT2<sup>+</sup> puncta colocalized with Iba1<sup>+</sup> cells (4-8mice per genotype; Newman-  
351 Keuls). **(D-F)** Quantification of the expression of transcripts of C1q genes *C1qa*, *C1qb*, and *C1qc*  
352 in the cerebella of 16-month-old female mice (4-8 mice per genotype; two-stage linear step-up  
353 procedure of Benjamini, Krieger and Yekutieli). **(G, H)** Co-localization of VGLUT2<sup>+</sup> puncta (green)  
354 and C1q (red) in the DCN of 16-month-old female mice (6-10 sections per genotype; Holm-  
355 Sidak's). Means  $\pm$  SEM, significantly different changes are marked by asterisks. \*,  $p < .05$ ; \*\*,  $p$   
356  $< 0.01$ , \*\*\*,  $p < 0.001$ . Scale bar in **(G)**, 20  $\mu$ m. Data underlying this figure can be found in Table  
357 S1.

358

359 **Csf3 heterozygosity prevents the overexpression of C1q genes and attenuates C1q deposition on**  
360 **glutamatergic synapses in *Csf1r*<sup>+/-</sup> mice**

361 The complement cascade of the innate immune system has emerged as an important mediator  
362 of synapse pruning during both brain development and disease (33, 34). The C1q factor,  
363 comprising 6 C1qA, 6 C1qB and 6 C1qC chains, is the initiating protein of the classical  
364 complement cascade and was reported to associate with synapses to promote their removal by  
365 microglia (34). These findings prompted us to analyze the expression of C1q genes in the  
366 cerebella of the mouse models analyzed and the extent of C1q deposition on glutamatergic  
367 synapses of DCN. Quantitative RT-PCR revealed significantly increased expression of *C1qb* and  
368 *C1qc* transcripts in *Csf1r*<sup>+/-</sup> mice, that was normalized by monoallelic targeting of *Csf3* (Fig. 7 D-  
369 F). The increased expression of *C1q* genes in *Csf1r*<sup>+/-</sup> mice was associated with increased C1q  
370 deposition on glutamatergic synapses, evidenced by the increased colocalization of C1q with  
371 VGLUT2<sup>+</sup> puncta (Fig. 7 G, H) and was normalized by monoallelic deletion of *Csf3*. In contrast,  
372 the expression of genes encoding other components of the complement cascade (*C3*),  
373 complement receptors (*Itgam*, *Itgax*, *Itgb2*), of neuronal proteins that mediate the synaptic  
374 deposition of C1q (*Nptx1*, *Nptx2*) (35) and of *Trem2*, a microglial receptor involved in synapse  
375 removal (36) was unchanged (Supplementary Fig. 1). Overall, these data, together with the



376 identification of microglia as the dominant source of C1q in the mouse brain (37), indicate that the  
377 elevated G-CSF signaling in CRL mice causes an excessive removal of glutamatergic synapses  
378 in the DCN through the activation of microglia.

379

## 380 Discussion

381 In a previous study, we demonstrated that *Csf1r*<sup>+/-</sup> mice reproduced the hallmark features of CRL  
382 patients (9). The cognitive, emotional and motor deficits were accompanied by histological  
383 alterations including elevated brain microglial density, callosal demyelination, cortical neuronal  
384 loss, and callosal axonal spheroids. These phenotypes were associated with increased brain  
385 expression of *Csf2*, encoding GM-CSF, and of *Csf3*, encoding the G-CSF (9). Subsequent studies  
386 in autopsied brain tissue of CRL patients showed increased expression of *CSF2* (10) and provided  
387 evidence of dysregulated G-CSF signaling (6, 7) suggesting an important role for these factors in  
388 CRL. Since the CSF-1R, as well as the receptors for both G- and GM-CSF, are predominantly  
389 expressed in microglia and regulate their activation (reviewed in (11)), it was suggested that CRL  
390 could be a primary microgliopathy. Indeed, monoallelic deletion of *Csf1r* in the microglial lineage  
391 recapitulated the phenotype observed in *Csf1r*<sup>+/-</sup> mice, indicating that CRL is a primary  
392 microgliopathy (8). Targeting *Csf2*, that encodes a microglial mitogen, rescued some behavioral  
393 defects (spatial memory, depression and olfactory) and the histological alterations observed in  
394 the forebrain of *Csf1r*<sup>+/-</sup> mice (microgliosis, callosal demyelination, decreased callosal volume) but  
395 did not attenuate the elevated microglial density in the cerebellum (10). Furthermore, the  
396 expression of *CSF3* was also elevated in post-mortem CRL brains (Fig. 1A). While G-CSF is not  
397 a microglial mitogen (38), its administration was reported induce the expansion of microglia *in*  
398 *vivo* (39), to activate a Cathepsin S-CX3CR1-inducible NOS pathway in microglia and to induce  
399 the production of factors that promote neuronal excitability (15). Therefore, we explored whether  
400 G-CSF may contribute to CRL pathogenesis.



401           A hallmark feature of CRL is the loss of callosal white matter (reviewed in (1, 5)). The  
402 primary function of the corpus callosum is to integrate the information by joining both cerebral  
403 hemispheres to process motor, sensory, and cognitive signals and disruption of myelination could  
404 potentially impact all these functions. Indeed, a study employing advanced MRI techniques  
405 revealed altered functional connectivity between the cerebral hemispheres in CRL patients and  
406 highlighted an association between their symptoms and the disconnection of the two cerebral  
407 hemispheres, due to the loss of connection fibers in the corpus callosum (40). Furthermore,  
408 studies in both autopsied tissue from CRL patients and the mouse model suggest that microglial  
409 activation contributes to the loss of callosal white matter (8, 10, 41, 42). Intriguingly, although  
410 targeting *Csf3* reduced the density of microglia in the corpus callosum, in contrast to *Csf2*  
411 reduction (10), it did not prevent their activation and clustering, nor did it prevent demyelination.  
412 In addition, targeting *Csf3* did not prevent the loss of layer V neurons, a population that is uniquely  
413 dependent on trophic support from microglia (43). Together, these data indicate that G-CSF does  
414 not play a major role in promoting demyelination or cortical neurodegeneration in the mouse  
415 model of CRL.

416           The memory deficits of *Csf1<sup>+/−</sup>* mice developed independently of the level *Csf3*  
417 expression. Furthermore, consistent with a previously published study in *Csf3<sup>−/−</sup>* mice (44), we  
418 show that monoallelic deletion of *Csf3* was sufficient to cause cognitive dysfunctions in wild type  
419 mice, a phenotype that could be related to the reduction of its neurogenic actions in the dorsal  
420 hippocampus. Nevertheless, monoallelic targeting of *Csf3* reduced microglial activation in the  
421 ventral hippocampus and ameliorated anxiety-like behavior in female mice. The factors  
422 contributing to the differential effects of G-CSF in different areas of the hippocampus remain to  
423 be elucidated. However, the rescue of two cerebellum-dependent functions, i.e. the motor and  
424 social interaction deficits (27, 45) by *Csf3* heterozygosity suggested that G-CSF mediates  
425 cerebellar dysfunction in CRL mice, a hypothesis that is supported by the histological data  
426 showing attenuation of microglial activation in all areas of the cerebellum following monoallelic

427 targeting of *Csf3* in *Csf1r<sup>+/-</sup>* mice. *Csf3* heterozygosity also decreased the elimination of  
428 glutamatergic synapses and restored electrophysiological activity in the deep cerebellar nuclei.  
429 Furthermore, these effects of *Csf3* heterozygosity were associated with normalization of the  
430 expression of *C1q* genes and of C1q deposition on glutamatergic synapses. Since *Csf3r*  
431 expression within the brain is largely restricted to microglia (46) (databases available at  
432 [https://portals.broadinstitute.org/single\\_cell/study/aging-mouse-brain](https://portals.broadinstitute.org/single_cell/study/aging-mouse-brain), <http://dropviz.org/>), we  
433 conclude that G-CSF mediated activation of microglia in specific brain regions promotes the  
434 development of anxiety-like behavior, motor coordination and social interaction deficits in *Csf1r<sup>+/-</sup>*  
435 mice.

436 Females tend to be more severely affected by CRL and exhibit a higher prevalence of gait  
437 disorders (5). Furthermore, ataxia and cerebellar involvement have also been reported  
438 predominantly in female CRL patients (13 out of 15 documented cases) (42, 45, 47-55). These  
439 findings raise the possibility that estrogens and/or androgens might specifically regulate  
440 subpopulations of microglia such as the cerebellar microglia, or those interacting with motor  
441 neurons. Remarkably, targeting *Csf3* selectively rescued the motor coordination deficits of female  
442 mice, while it also tended to worsen motor function in males (Fig. 1 P). This finding is not unique  
443 to the CRL mouse model. Administration of G-CSF has also produced gender-specific effects in  
444 both preclinical and clinical trials for amyotrophic lateral sclerosis, providing protection in males  
445 by attenuating inflammation and exacerbating the loss of motor function in females (56-58). These  
446 data suggest an interaction of G-CSF with gender-specific factors, likely hormonal, in the control  
447 of neuroinflammation, an aspect that deserves further exploration.

448 In conclusion, this study identifies elevated G-CSF as the main factor driving anxiety and  
449 cerebellar dysfunctions contributing to the motor coordination and social preference deficits in  
450 CRL. Apart from their overlapping contributions to the motor coordination deficit, the effects of  
451 elevated G-CSF and GM-CSF in CRL are non-redundant (10) (Table 1). Thus, our studies point  
452 to G-CSF as an additional potential therapeutic target in CRL.

453 **Table 1: Effects of elevated *Csf3* and *Csf2* in mouse CRL illustrating their complementary**  
 454 **contribution to disease development**

| Deficit/Pathology<br>in CRL mouse                              | Males       |             | Females     |             |
|----------------------------------------------------------------|-------------|-------------|-------------|-------------|
|                                                                | <i>Csf2</i> | <i>Csf3</i> | <i>Csf2</i> | <i>Csf3</i> |
| Short term memory                                              | +           | -           | +           | -           |
| Long term memory                                               | +           | -           | +           | -           |
| Cognitive flexibility                                          | NA          | -           | NA          | -           |
| Olfaction                                                      | +           | ND          | +           | ND          |
| Anxiety (F only)                                               |             |             | -           | +           |
| Motor coordination (F only)                                    |             |             | +           | +           |
| Depression (M only)                                            | +           | NA          |             |             |
| Social novelty                                                 | NA          | +           | NA          | +           |
| Cerebral microgliosis                                          | +           | -           | +           | _*          |
| Callosal demyelination                                         | +           | -           | +           | -           |
| Loss of Layer V Cx neurons                                     | -           | -           | -           | -           |
| Cerebellar microgliosis                                        | -           | +           | -           | +           |
| DCN firing                                                     | ND          | +           | ND          | +           |
| DCN synapse removal                                            | ND          | +           | ND          | +           |
| C1q overexpression and<br>deposition on excitatory<br>synapses | ND          | +           | ND          | +           |

455  
 456 + CRL phenotype attenuated by loss of an allele

457 - CRL phenotype unaffected by loss of an allele

458 \*,Except for the ventral hippocampus

459 NA, Test not available for the cohort

460 ND, Test not done due to absence of effect of monoallelic *Csf3* heterozygosity on forebrain

461 microgliosis, or of monoallelic *Csf2* heterozygosity on cerebellar microgliosis

462

463

## 464 Materials and methods

465

### 466 **Mouse strains, breeding, and maintenance**

467 Experiments were performed on adult C57BL/6J mice (RRID: IMSR JAX:000664) of the indicated  
468 ages and genders. The generation, maintenance and genotyping of *Csf1r*<sup>+/-</sup> mice was described  
469 previously (59). *Csf3*<sup>+/-</sup> mice on a mixed C57BL/6 x 129/Ola genetic background (60) were  
470 obtained from Jackson Laboratories and genotyped by PCR utilizing the following primers: *Csf3*-  
471 Fw (5'- GCACCCTCAGTATCCTTCCA-3'), *Csf3*-Rev (5'- GCTAGAGCAGCCACTCAGG -3') and  
472 *Csf3*-Neo (5'-GCTATCAGGACATAGCGTTGG-3') specific for the neomycin resistance gene.  
473 Both lines were backcrossed for more than 10 generations onto the C57BL6/J background.  
474 Cohorts were developed from the progeny of matings of *Csf1r*<sup>+/-</sup> to *Csf3*<sup>+/-</sup> mice, randomized with  
475 respect to the litter of origin and maintained on a breeder (PicoLab Rodent Diet 20 5058) rather  
476 than a maintenance diet, in order to accelerate symptom development (5). The age and sex of  
477 mice used in each experiment are indicated in the figures. All *in vivo* experiments were performed  
478 in accordance with the National Institutes of Health regulations on the care and use of  
479 experimental animals and approved by the Institutional Animal Care and Use Committees of  
480 Albert Einstein College of Medicine and Hunter College.

481

### 482 **Behavioral studies**

483 Male and female mice were tested sequentially for memory, anxiety, motor coordination and  
484 social interaction. A separate cohort was developed for active place avoidance. All the  
485 experiments were conducted by a blinded experimenter during the light cycle. The animals were  
486 allowed to acclimate to the behavior room for one hour before the beginning of each experiment.

487 For each experimental paradigm, mice were randomized and balanced to avoid unwanted effects  
488 of confounding factors.

489

490 *Cognitive flexibility*

491 Cognitive flexibility was evaluated in the active place avoidance paradigm at 7 months of age (21).

492 The apparatus consisted of a circular 40 cm diameter platform rotating clockwise at 1 rpm. A

493 camera placed above the apparatus recorded the mouse location during each stage of the

494 experiment. The apparatus was controlled by PC-based software (Tracker, Bio-Signal Group

495 Corp., Brooklyn, NY) that tracked the mouse position and delivered a foot shock (500 ms, 60 Hz,

496 0.2 mA) every time the mouse was inside a 60° stationary shock zone that could be identified by

497 visual cues within the room. The number of entrances into the shock zone was recorded

498 throughout the duration of the experiment.

499 The task included four steps:

500 1) Habituation. Mice were allowed to freely explore the apparatus in the absence of shock  
501 for 30 minutes.

502 2) Training. For three consecutive days, mice were placed on the apparatus with the shock  
503 turned on. Each day, mice were trained with a single 30-minute trial to avoid one shock  
504 zone. The location of the shock zone was constant across trials.

505 3) Long-term memory test. Mice were returned to the apparatus three days after the last  
506 training day with the shock turned on. During this 10-minute trial, the shock zone remained  
507 in the same location as the previous training trials.

508 4) Cognitive flexibility test. Two hours after the long-term memory test, the location of the  
509 shock zone was moved to the opposite side of the arena, which is where mice primarily  
510 spent their time on the previous trials. The number of entrances into the new shock zone  
511 was recorded over a 20 min period.

512

513 *Spatial memory*

514 Short-term memory. Mice were assessed at 11.5 months of age for short-term spatial memory in  
515 the two-stage version of the Y-maze (61). In the first training stage, each mouse was introduced  
516 into the Y-maze and allowed to explore two of the three arms of the apparatus. In the second  
517 testing stage, conducted one hour later, the remaining arm was opened and the mouse returned  
518 to the apparatus to freely explore all the three arms. Internal visual cues were placed inside each  
519 arm as referential tools to explore the maze. The number of arm entries into each arm was tracked  
520 and recorded by Any-maze (Stoelting). The positions of the three arms were randomized within  
521 each genotype.

522 Long-term memory. Long-term spatial recognition memory was evaluated in 11.5-old  
523 month mice using the object placement test. Each mouse was allowed to interact with two identical  
524 objects placed 10 cm apart parallel to one of the walls of a 40 cm x 40 cm chamber for 10 minutes  
525 (training). After 24 hours, one of the objects was displaced into a novel position (15 cm distant,  
526 90° angled) and the mouse returned to explore the objects for 10 minutes (testing). Visual cues  
527 were affixed to the walls of the chamber to assist orientation within the arena. Time interacting  
528 with the objects was tracked by a blinded experimenter.

529

530 *Anxiety-like behavior*

531 Anxiety was measured by using the elevated zero maze (Ugo Basile Instruments) at the age of  
532 12 months. The apparatus consisted of an elevated ring-shaped apparatus (diameter 50 cm, width  
533 5 cm) including two opposite open zones, and two opposite enclosed zones. Each mouse was  
534 allowed to explore the apparatus for 3 minutes. Cumulative time spent in the open zones was  
535 tracked by ANY-maze software (ANY-maze, Stoelting), and utilized as a measure inversely  
536 related to anxiety (62).

537

538 *Motor coordination*

539 Motor coordination was tested in the balance beam test (63). The balance beam consisted of a  
540 1-meter-long wooden beam (1.6 cm in diameter) elevated 50 cm above the floor. Each mouse  
541 was positioned at one end of the beam and encouraged to cross the beam. The presence of  
542 palatable food placed at the opposite end was used as reinforcement to accomplish the task. The  
543 number of slips tracked by the experimenter were used as measure of motor coordination.

544

#### 545 *Social interaction*

546 Sociability was tested in 10-18-month-old mice using the three-chamber sociability test (25). This  
547 paradigm is based on the natural tendency of mice to preferentially interact with other mice rather  
548 than with an inanimate object (social preference), and with a novel mouse rather than with a  
549 familiar mouse (social novelty). The three-chamber apparatus consisted of a white Plexiglas box  
550 (60 x 40 x 15 cm) divided into three chambers (20 x 40 x 15 cm) by two transparent Plexiglas  
551 walls (40 x 15 cm). Entry from the middle chamber to each lateral chamber was made accessible  
552 by removable sliding doors (9 x 5.5 cm) (Fig. 5a). The experiment consisted of three 10-minute  
553 consecutive stages: habituation, social preference test and social novelty test. Before the start of  
554 each stage, the experimental mouse was confined to the middle chamber by the dividing doors.  
555 In the habituation, each mouse was allowed to explore the whole empty apparatus. In the social  
556 preference test, the mouse was exposed to an object (a plastic black cube) and to another mouse  
557 (familiar mouse). In the social novelty test, the object was replaced by another mouse (novel  
558 mouse), and the experimental mouse allowed to explore the apparatus and interact with the mice.  
559 The object, the familiar mouse and the novel mouse were placed under wire mesh pen cups (11.5  
560 cm high, 9.5 cm in diameter) when introduced into the apparatus. The time interacting with each  
561 object or mouse was recorded by ANY-maze video tracking system (ANY-maze, Stoelting).

562

#### 563 **Human studies**

564 Frozen brain tissue blocks containing periventricular white and grey matter were obtained from  
565 the Mayo Clinic Brain Bank. Consent for autopsy was obtained from the legal next-of-kin.  
566 Information on the CRL patients harboring CSF1R mutations and control cases included in this  
567 study is summarized in Table S2. Upon removal from the skull according to standard autopsy  
568 pathology practices, the brain was divided in the mid-sagittal plane. Half was fixed in 10% neutral  
569 buffered formalin, and half was frozen in a -80°C freezer, face down to avoid distortion. The frozen  
570 brain was shipped on dry ice to the Neuropathology Laboratory at Mayo Clinic, where it was stored  
571 in a -80°C freezer. Frozen tissue was partially thawed before dissection and slabbed in a coronal  
572 plane at about 1-cm thickness. Regions of interest were dissected from the frozen slabs and  
573 placed in microcentrifuge tubes before being shipped to the research laboratory on dry ice. At all  
574 steps, the fresh and frozen tissue was handled with Universal Precautions.

575

#### 576 **Gene expression in CRL patients and mouse brains**

577 RNA was isolated from the gray matter of 5 CRL patients and 5 control patients (see Supplemental  
578 Table 1) using Trizol and cDNA was prepared using a Super Script III First Strand Synthesis kit  
579 (Invitrogen, Carlsbad, CA). Real time PCR was performed using the PrimePCR CSF3 assay  
580 qHsaCED0043218 from BIO-RAD. Human *RPL13* (Fw: 5'-AGCCTACAAGAAAGTTTGCCTAT-  
581 3'; Rev: 5'-TCTTCTTCCGGTAGTGGATCTTGGC-3') was used for normalization. Average values  
582 from two different blocks of tissue per patient, were used to construct the figure.

583 For mouse studies, the RNA was extracted from the anterior motor cortex, corpus  
584 callosum and cerebellum of 6-month-old mice as described (9), reverse-transcribed as described  
585 above and the qPCR was carried out utilizing SYBR Green in an Eppendorf Realplex II  
586 thermocycler. Beta actin was used as a housekeeping gene control. The primers for mouse genes  
587 used were as follows: *Csf3* (Fw: 5'-GAGCAGTTGTGTGCCACCTA-3'; Rev: 5'-  
588 GCTTAGGCACTGTGT CTGCTG-3'), *C1qa* (Fw: 5'-GGATGGGGCTCCAGGAAATC- 3'; Rev: 5'-  
589 CTGATA TTGCCTGGATTGCC- 3'), *C1qb* (Fw: 5'-TGGCTCTGATGGCCAACCAG-3'; Rev: 5'-



590 GACTTTCTGTGTAGCCCCGT-3'), *C1qc* (Fw: 5'-AGGACGGGCATGATGGACTC- 3'; Rev: 5'-  
591 TGAATACCGACTGGTGCTTC-3'), *C3* (Fw: 5'-CGCAACGAACAGGTGGAGATCA- 3'; Rev: 5'-  
592 CTGGAAGTAGCGATTCTTGGCG-3'), *Itgam* (Fw: 5'-CTGAGACTGGAGGCAACCAT-3'; Rev: 5'-  
593 GATATCTCCTTCGCGCAGAC-3'), *Itgb2* (Fw: 5'-CCCAGGAATGCACCAAGTACA-3'; Rev: 5'-  
594 CAGTGAAGTTCAGCTTCTGGCA- 3'), *Itgax* (Fw: 5'- CTGGATAGCCTTTCTTCTGCTG- 3'; Rev:  
595 5'- GCACACTGTGTCCGAACTCA-3'), *Nptx1* (Fw: 5'-ATCACCCCATCAAACCACAG-3'; Rev: 5'-  
596 CGATGACATTGCCAGAGAGA-3'), *Nptx2* (Fw: 5'-CGGAGCTGGAAGATGAGAAG-3'; Rev: 5'-  
597 GGAAGGGACACTTTGAATGC-3'), *Hprt* (Fw: 5'-CAAACCTTTGCTTTCCCTGGT-3'; Rev:  
598 CAAGGGCATATCCAACAACA), *Actb* (Fw: 5'- AGAGGGAAATCGTGCGTGAC-3'; Rev: 5'-  
599 CAATAGTGATGACCTGGCCGT-3').

600

#### 601 **Immunofluorescence staining and data analysis**

602 Immunostaining was performed in brain slices prepared as described previously (8). Brain  
603 sections were incubated with primary antibodies overnight at 4°C. The primary antibodies used  
604 in the study included: Iba1 (1:500) (rabbit IgG; Wako Chemicals RRID: AB\_839504 or goat IgG;  
605 Abcam RRID:AB\_10972670); Calbindin, (1: 500) (mouse IgG, Abcam RRID:AB\_1658451); NeuN  
606 (1:500) (mouse IgG, Millipore RRID:AB\_2149209); GAD67 (1:500) (mouse IgG, Millipore  
607 RRID:AB\_94905); VGLUT2 (1:500) (polyclonal guinea pig antiserum, Synaptic Systems  
608 RRID:AB\_887884). Following incubation with primary antibodies, the sections were incubated  
609 with secondary antibodies conjugated to either Alexa 488, Alexa 594, or Alexa 647 (1:500) (Life  
610 Technologies) for 1 hour at room temperature. Fluoromyelin staining for myelin (1:350, 30  
611 minutes) was performed according to the manufacturer's (Molecular Probes, Inc.) instructions.

612 For C1q staining, slices were blocked with 5% bovine serum albumin (BSA) and 0.2%  
613 Triton X-100 solution for 1 h and incubated with primary antibody overnight (1:500) (rabbit IgG,  
614 Abcam RRID:AB\_2732849). After washing, the secondary antibody was applied and incubation  
615 continued for 2 hours at room temperature (64). Sections were mounted on SuperFrost Plus slides

616 (Thermofisher) using Prolong antifade mountant with DAPI (Thermofisher). Images were captured  
617 using a Nikon Eclipse TE300 fluorescence microscope with NIS Elements D4.10.01 software. Cell  
618 number quantification was performed manually. Quantification of fluorescent areas was  
619 performed using ImageJ.

620 For confocal microscopy, microscope Z series stacks were obtained by a Leica SP8  
621 Confocal microscope at  $\times 40$  magnification with a 0.40  $\mu\text{m}$  interval between stacks. Images were  
622 cropped and adjusted for brightness, contrast and color balance using Adobe Photoshop CC. For  
623 analysis of synapse engulfment, Imaris software (Oxford Instruments Group) was used to analyze  
624 colocalization and to generate 3D reconstructions and surface renderings (65).

625 Morphometric analysis of microglia (number of end points and length of cell processes)  
626 was performed on maximum intensity projections of tissue sections using FIJI as previously  
627 described (10, 66). The extent of microglia-Purkinje cell contacts was examined in confocal 3D  
628 surface rendering images using Imaris as described (67).

629

### 630 ***In vivo* electrophysiology**

631 *In vivo* single unit recording in the cerebellum was performed in awake head-restrained mice.  
632 Mice were anesthetized with isoflurane (5% induction, 2% maintenance), the head shaved, wiped  
633 with ethanol and betadine and the scalp reflected to reveal the skull. The skull was lightly scraped  
634 and cleaned with ethanol. Recording coordinates were then marked by lightly drilling over the  
635 interparietal bone which overlies the cerebellum and touching the drilled sites with a marker pen.  
636 The skull was then covered with OptiBond (Kerr Corporation, Brea, CA, USA) and cured with  
637 ultraviolet light. A titanium bracket was subsequently fixed onto the skull with Charisma (Kulzer  
638 GmbH, Germany) just anterior to the lambdoid suture, enabling later access to the cerebellum,  
639 and covered with dental cement (M& Dental Supply, Jamaica, NY, USA). A recording chamber  
640 was simultaneously created over the interparietal bone and once the cement dried, the chamber  
641 was covered with Kwik-Sil silicone elastomer (World Precision Instruments, Sarasota, FL, USA).

642 The mice were monitored post-surgery for 1 week before neural recordings. During this time, the  
643 mice were acclimated to head-restraint using screws to immobilize the previously implanted  
644 bracket. This was done for 0.5-1 h per day. Twenty-four hours prior to recording, a craniotomy  
645 was created by removing the Kwik-Sil covering the recording chamber and drilling at coordinates  
646 previously marked over the interparietal bone. Purkinje cells were recorded at AP: -6.00 mm, ML:  
647 0 mm and AP: -7.0 mm, ML: 0mm; and deep cerebellar nuclei at AP: - 6.2 mm, ML:  $\pm$  1.5 mm.  
648 The recording chamber was recovered with Kwik-Sil and the mouse was allowed to recover.

649 For single unit recordings, the mouse was head restrained next to a stereotaxic apparatus  
650 on a padded flat air table using the head bracket and screws. The Kwik-Sil was removed from the  
651 recording chamber, revealing the craniotomies. A ground electrode was then placed into the  
652 recording chamber, a tungsten electrode (2-3 M $\Omega$ , Thomas Recording, Giessen, Germany)  
653 lowered under microscopic guidance into a craniotomy until it touched the surface of the  
654 brain/cerebellum, and the chamber filled with saline. In single unit recording, the electrode was  
655 further slowly advanced into the cerebellum until neuronal activity was detected but not more than  
656 3 mm below the surface of the brain. Purkinje cell activity was identified by their characteristic  
657 firing rate, location and the brief pauses in firing following complex spikes. DCN cells were  
658 identified based on their location and firing. Cells were recorded for 2-5 mins. Neural signals were  
659 filtered at 20 kHz, amplified at 2000X on a custom amplifier, digitized at 20kHz with a National  
660 Instruments BNC-2110 (National Instruments, Austin, TX, USA) analog to digital converter into a  
661 PC and visualized with LabView (National Instruments, Austin, TX, USA). Waveforms of recorded  
662 single unit activity were sorted offline using Offline Sorter software (Plexon, Dallas, TX, USA) and  
663 analyzed using a custom LabView script to obtain the average firing rate, predominant firing rate  
664 and the interspike interval coefficient of variation (ISI CV).

665

666 **Statistical analyses**

667 Statistical analyses were computed using GraphPad Prism 8 (GraphPad, La Jolla, CA). Data were  
668 checked for outliers using the Grubbs' method. Gaussian distribution was evaluated using the  
669 Shapiro-Wilk normality test and the Kolmogorov-Smirnov test. The screened data were analyzed  
670 using the Student t-test, the Kruskal–Wallis test or by analysis of variance (one- or two-way  
671 ANOVA). When significant effects of the independent variables were detected, single differences  
672 between or within genotypes were analyzed by post-hoc multiple comparison tests (Dunnett's,  
673 Bonferroni, Tukey's, Fisher's LSD, and the two-stage linear step-up procedure of Benjamini,  
674 Krieger and Yekutieli as indicated in the figure legends). The level of significance was set at  $p <$   
675  $0.05$ . For those comparisons in which no statistical significance is indicated in the figure panels,  
676 the  $p$  value was  $> 0.05$ . Data are presented as mean  $\pm$  SEM. Sample sizes for each experiment  
677 are indicated in the figure legends.

678

## 679 Data Availability

680 The data sets used and analyzed during the current study are available from the corresponding  
681 author on reasonable request.

682

## 683 Acknowledgements

684 The authors thank Hillary Guzik, Andrea Briceno and Dr Vera Des-Marais of the Einstein  
685 Analytical Imaging Facility for help with imaging and histomorphometry, Dr. Daniel Wilton of Dr.  
686 Beth Stevens laboratory for sharing their protocol for C1q staining and Christopher Fernandes  
687 and Jude Oppong-Asare for technical assistance.

688

## 689 Funding disclosure

690 This work was supported by grants from the National Institutes of Health: Grant R01NS091519  
691 (to E. R. S.), R01NS105470 (to K.K.), R21MH114182 (N.S.B), U54 HD090260 (support for the

692 Rose F. Kennedy IDRC), the P30CA013330 NCI Cancer Center Grant and a gift from David  
693 and Ruth Levine. ZKW is partially supported by the NIH/NIA and NIH/NINDS (1U19AG063911,  
694 FAIN: U19AG063911), Mayo Clinic Center for Regenerative Medicine, Mayo Clinic in Florida  
695 Focused Research Team Program, the gifts from The Sol Goldman Charitable Trust, and the  
696 Donald G. and Jodi P. Heeringa Family, the Haworth Family Professorship in Neurodegenerative  
697 Diseases fund, and The Albertson Parkinson's Research Foundation.

698

### 699 Competing interests

700 The authors declare that they have no competing interests.

701

702

703

704

## 705 References

706

- 707 1. Konno T, Kasanuki K, Ikeuchi T, Dickson DW, Wszolek ZK. CSF1R-related  
708 leukoencephalopathy: A major player in primary microgliopathies. *Neurology*.  
709 2018;91(24):1092-104.
- 710 2. Nicholson AM, Baker MC, Finch NA, Rutherford NJ, Wider C, Graff-Radford NR,  
711 et al. CSF1R mutations link POLD and HDLS as a single disease entity. *Neurology*.  
712 2013;80(11):1033-40.
- 713 3. Rademakers R, Baker M, Nicholson AM, Rutherford NJ, Finch N, Soto-Ortolaza  
714 A, et al. Mutations in the colony stimulating factor 1 receptor (CSF1R) gene cause  
715 hereditary diffuse leukoencephalopathy with spheroids. *Nat Genet*. 2011;44(2):200-5.
- 716 4. Konno T, Tada M, Tada M, Koyama A, Nozaki H, Harigaya Y, et al.  
717 Haploinsufficiency of CSF-1R and clinicopathologic characterization in patients with  
718 HDLS. *Neurology*. 2014;82(2):139-48.
- 719 5. Chitu V, Gokhan S, Stanley ER. Modeling CSF-1 receptor deficiency diseases -  
720 how close are we? *Febs J*. 2021.
- 721 6. Kempthorne L, Yoon H, Madore C, Smith S, Wszolek ZK, Rademakers R, et al.  
722 Loss of homeostatic microglial phenotype in CSF1R-related Leukoencephalopathy. *Acta*  
723 *Neuropathol Commun*. 2020;8(1):72.
- 724 7. Kempthorne L, Yoon H, Madore C, Smith S, Wszolek ZK, Rademakers R, et al.  
725 Correction to: Loss of homeostatic microglial phenotype in CSF1R-related  
726 Leukoencephalopathy. *Acta Neuropathol Commun*. 2020;8(1):90.
- 727 8. Biundo F, Chitu V, Shlager GGL, Park ES, Gulinello ME, Saha K, et al. Microglial  
728 reduction of colony stimulating factor-1 receptor expression is sufficient to confer adult  
729 onset leukodystrophy. *Glia*. 2021;69:779-91.
- 730 9. Chitu V, Gokhan S, Gulinello M, Branch CA, Patil M, Basu R, et al. Phenotypic  
731 characterization of a Csf1r haploinsufficient mouse model of adult-onset leukodystrophy  
732 with axonal spheroids and pigmented glia (ALSP). *Neurobiol Dis*. 2015;74:219-28.
- 733 10. Chitu V, Biundo F, Shlager GGL, Park ES, Wang P, Gulinello ME, et al.  
734 Microglial Homeostasis Requires Balanced CSF-1/CSF-2 Receptor Signaling. *Cell Rep*.  
735 2020;30(9):3004-19 e5.
- 736 11. Chitu V, Biundo F, Stanley ER. Colony stimulating factors in the nervous system.  
737 *Semin Immunol*. 2021:101511.
- 738 12. Schermer C, Humpel C. Granulocyte macrophage-colony stimulating factor  
739 activates microglia in rat cortex organotypic brain slices. *Neurosci Lett*.  
740 2002;328(2):180-4.
- 741 13. Xiao BG, Xu LY, Yang JS. TGF-beta 1 synergizes with GM-CSF to promote the  
742 generation of glial cell-derived dendriform cells in vitro. *Brain Behav Immun*.  
743 2002;16(6):685-97.
- 744 14. Smith ME. Phagocytosis of myelin by microglia in vitro. *J Neurosci Res*.  
745 1993;35(5):480-7.
- 746 15. Basso L, Lapointe TK, Iftinca M, Marsters C, Hollenberg MD, Kurrasch DM, et al.  
747 Granulocyte-colony-stimulating factor (G-CSF) signaling in spinal microglia drives

- 748 visceral sensitization following colitis. *Proc Natl Acad Sci U S A*. 2017;114(42):11235-  
749 40.
- 750 16. Darmohray DM, Jacobs JR, Marques HG, Carey MR. Spatial and Temporal  
751 Locomotor Learning in Mouse Cerebellum. *Neuron*. 2019;102(1):217-31 e4.
- 752 17. Parfitt GM, Nguyen R, Bang JY, Aqrabawi AJ, Tran MM, Seo DK, et al.  
753 Bidirectional Control of Anxiety-Related Behaviors in Mice: Role of Inputs Arising from  
754 the Ventral Hippocampus to the Lateral Septum and Medial Prefrontal Cortex.  
755 *Neuropsychopharmacology*. 2017;42(8):1715-28.
- 756 18. Armbruster DJ, Ueltzhoffer K, Basten U, Fiebach CJ. Prefrontal cortical  
757 mechanisms underlying individual differences in cognitive flexibility and stability. *J Cogn  
758 Neurosci*. 2012;24(12):2385-99.
- 759 19. Albert MS. Cognitive and neurobiologic markers of early Alzheimer disease. *Proc  
760 Natl Acad Sci U S A*. 1996;93(24):13547-51.
- 761 20. Zur-Wyrozumska K, Kaczmarek P, Mensah-Glanowska P. Adult-onset  
762 leukoencephalopathy with axonal spheroids and pigmented glia associated with an  
763 A792D mutation in the CSF1R gene in a Polish patient. *Neurol Neurochir Pol*.  
764 2021;53:322-4.
- 765 21. Burghardt NS, Park EH, Hen R, Fenton AA. Adult-born hippocampal neurons  
766 promote cognitive flexibility in mice. *Hippocampus*. 2012;22(9):1795-808.
- 767 22. Fanselow MS, Dong HW. Are the dorsal and ventral hippocampus functionally  
768 distinct structures? *Neuron*. 2010;65(1):7-19.
- 769 23. Sanchez-Ramos J, Song S, Sava V, Catlow B, Lin X, Mori T, et al. Granulocyte  
770 colony stimulating factor decreases brain amyloid burden and reverses cognitive  
771 impairment in Alzheimer's mice. *Neuroscience*. 2009;163(1):55-72.
- 772 24. Safaiyan S, Besson-Girard S, Kaya T, Cantuti-Castelvetri L, Liu L, Ji H, et al.  
773 White matter aging drives microglial diversity. *Neuron*. 2021;109(7):1100-17 e10.
- 774 25. Kana V, Desland FA, Casanova-Acebes M, Ayata P, Badimon A, Nabel E, et al.  
775 CSF-1 controls cerebellar microglia and is required for motor function and social  
776 interaction. *J Exp Med*. 2019;216(10):2265-81.
- 777 26. Nandi S, Gokhan S, Dai XM, Wei S, Enikolopov G, Lin H, et al. The CSF-1  
778 receptor ligands IL-34 and CSF-1 exhibit distinct developmental brain expression  
779 patterns and regulate neural progenitor cell maintenance and maturation. *Dev Biol*.  
780 2012;367(2):100-13.
- 781 27. Carta I, Chen CH, Schott AL, Dorizan S, Khodakhah K. Cerebellar modulation of  
782 the reward circuitry and social behavior. *Science*. 2019;363(6424).
- 783 28. Tsai PT, Hull C, Chu Y, Greene-Colozzi E, Sadowski AR, Leech JM, et al.  
784 Autistic-like behaviour and cerebellar dysfunction in Purkinje cell Tsc1 mutant mice.  
785 *Nature*. 2012;488(7413):647-51.
- 786 29. Kozareva V, Martin C, Osorno T, Rudolph S, Guo C, Vanderburg C, et al. A  
787 transcriptomic atlas of mouse cerebellar cortex comprehensively defines cell types.  
788 *Nature*. 2021;598(7879):214-9.
- 789 30. Schafer DP, Stevens B. Phagocytic glial cells: sculpting synaptic circuits in the  
790 developing nervous system. *Curr Opin Neurobiol*. 2013;23(6):1034-40.
- 791 31. Sierra A, Encinas JM, Deudero JJ, Chancey JH, Enikolopov G, Overstreet-  
792 Wadiche LS, et al. Microglia shape adult hippocampal neurogenesis through apoptosis-  
793 coupled phagocytosis. *Cell Stem Cell*. 2010;7(4):483-95.



- 794 32. Baumel Y, Jacobson GA, Cohen D. Implications of functional anatomy on  
795 information processing in the deep cerebellar nuclei. *Front Cell Neurosci.* 2009;3:14.
- 796 33. Stevens B, Allen NJ, Vazquez LE, Howell GR, Christopherson KS, Nouri N, et al.  
797 The classical complement cascade mediates CNS synapse elimination. *Cell.*  
798 2007;131(6):1164-78.
- 799 34. Hong S, Beja-Glasser VF, Nfonoyim BM, Frouin A, Li S, Ramakrishnan S, et al.  
800 Complement and microglia mediate early synapse loss in Alzheimer mouse models.  
801 *Science.* 2016;352(6286):712-6.
- 802 35. Kovacs RA, Vadaszi H, Bulyaki E, Torok G, Toth V, Matyas D, et al. Identification  
803 of Neuronal Pentraxins as Synaptic Binding Partners of C1q and the Involvement of  
804 NP1 in Synaptic Pruning in Adult Mice. *Front Immunol.* 2020;11:599771.
- 805 36. Filipello F, Morini R, Corradini I, Zerbi V, Canzi A, Michalski B, et al. The  
806 Microglial Innate Immune Receptor TREM2 Is Required for Synapse Elimination and  
807 Normal Brain Connectivity. *Immunity.* 2018;48(5):979-91 e8.
- 808 37. Fonseca MI, Chu SH, Hernandez MX, Fang MJ, Modarresi L, Selvan P, et al.  
809 Cell-specific deletion of C1qa identifies microglia as the dominant source of C1q in  
810 mouse brain. *J Neuroinflammation.* 2017;14(1):48.
- 811 38. Giulian D, Ingeman JE. Colony-stimulating factors as promoters of amoeboid  
812 microglia. *J Neurosci.* 1988;8:4707-17.
- 813 39. Chen CH, Huang SY, Chen NF, Feng CW, Hung HC, Sung CS, et al. Intrathecal  
814 granulocyte colony-stimulating factor modulate glial cell line-derived neurotrophic factor  
815 and vascular endothelial growth factor A expression in glial cells after experimental  
816 spinal cord ischemia. *Neuroscience.* 2013;242:39-52.
- 817 40. Zhan FX, Zhu ZY, Liu Q, Zhou HY, Luan XH, Huang XJ, et al. Altered structural  
818 and functional connectivity in CSF1R-related leukoencephalopathy. *Brain Imaging*  
819 *Behav.* 2020.
- 820 41. Kinoshita M, Oyanagi K, Kondo Y, Ishizawa K, Ishihara K, Yoshida M, et al.  
821 Pathologic basis of the preferential thinning of the corpus callosum in adult-onset  
822 leukoencephalopathy with axonal spheroids and pigmented glia (ALSP).  
823 *eNeurologicalSci.* 2021;22:100310.
- 824 42. Kim EJ, Shin JH, Lee JH, Kim JH, Na DL, Suh YL, et al. Adult-onset  
825 leukoencephalopathy with axonal spheroids and pigmented glia linked CSF1R mutation:  
826 Report of four Korean cases. *J Neurol Sci.* 2015;349(1-2):232-8.
- 827 43. Ueno M, Fujita Y, Tanaka T, Nakamura Y, Kikuta J, Ishii M, et al. Layer V cortical  
828 neurons require microglial support for survival during postnatal development. *Nat*  
829 *Neurosci.* 2013;16(5):543-51.
- 830 44. Diederich K, Sevimli S, Dorr H, Kusters E, Hoppen M, Lewejohann L, et al. The  
831 role of granulocyte-colony stimulating factor (G-CSF) in the healthy brain: a  
832 characterization of G-CSF-deficient mice. *J Neurosci.* 2009;29(37):11572-81.
- 833 45. Mateen FJ, Keegan BM, Krecke K, Parisi JE, Trenerry MR, Pittock SJ. Sporadic  
834 leucodystrophy with neuroaxonal spheroids: persistence of DWI changes and  
835 neurocognitive profiles: a case study. *J Neurol Neurosurg Psychiatry.* 2010;81(6):619-  
836 22.
- 837 46. Ximerakis M, Lipnick SL, Innes BT, Simmons SK, Adiconis X, Dionne D, et al.  
838 Single-cell transcriptomic profiling of the aging mouse brain. *Nat Neurosci.*  
839 2019;22(10):1696-708.



- 840 47. Lynch DS, Jaunmuktane Z, Sheerin UM, Phadke R, Brandner S, Milonas I, et al.  
841 Hereditary leukoencephalopathy with axonal spheroids: a spectrum of phenotypes from  
842 CNS vasculitis to parkinsonism in an adult onset leukodystrophy series. *J Neurol*  
843 *Neurosurg Psychiatry*. 2016;87(5):512-9.
- 844 48. Lynch DS, Rodrigues Brandao de Paiva A, Zhang WJ, Bugiardini E, Freua F,  
845 Tavares Lucato L, et al. Clinical and genetic characterization of leukoencephalopathies  
846 in adults. *Brain*. 2017;140(5):1204-11.
- 847 49. Riku Y, Ando T, Goto Y, Mano K, Iwasaki Y, Sobue G, et al. Early pathologic  
848 changes in hereditary diffuse leukoencephalopathy with spheroids. *J Neuropathol Exp*  
849 *Neurol*. 2014;73(12):1183-90.
- 850 50. Bonvegna S, Straccia G, Golfre Andreasi N, Elia AE, Marucci G, Di Bella D, et al.  
851 Parkinsonism and Nigrostriatal Damage Secondary to CSF1R-Related Primary  
852 Microgliopathy. *Mov Disord*. 2020;35(12):2360-2.
- 853 51. Meyer-Ohlendorf M, Braczynski A, Al-Qaisi O, Gessler F, Biskup S, Weise L, et  
854 al. Comprehensive diagnostics in a case of hereditary diffuse leukodystrophy with  
855 spheroids. *BMC neurology*. 2015;15:103.
- 856 52. Guerreiro R, Kara E, Le Ber I, Bras J, Rohrer JD, Taipa R, et al. Genetic analysis  
857 of inherited leukodystrophies: genotype-phenotype correlations in the CSF1R gene.  
858 *JAMA Neurol*. 2013;70(7  
859 ):875-82.
- 860 53. Kim SI, Jeon B, Bae J, Won JK, Kim HJ, Yim J, et al. An Autopsy Proven Case of  
861 CSF1R-mutant Adult-onset Leukoencephalopathy with Axonal Spheroids and  
862 Pigmented Glia (ALSP) with Premature Ovarian Failure. *Exp Neurobiol*. 2019;28(1):119-  
863 29.
- 864 54. Sundal C, Baker M, Karrenbauer V, Gustavsen M, Bedri S, Glaser A, et al.  
865 Hereditary diffuse leukoencephalopathy with spheroids with phenotype of primary  
866 progressive multiple sclerosis. *Eur J Neurol*. 2015;22(2):328-33.
- 867 55. Karle KN, Biskup S, Schule R, Schweitzer KJ, Kruger R, Bauer P, et al. De novo  
868 mutations in hereditary diffuse leukoencephalopathy with axonal spheroids (HDLS).  
869 *Neurology*. 2013;81(23):2039-44.
- 870 56. Naumenko N, Pollari E, Kurronen A, Giniatullina R, Shakirzyanova A, Magga J,  
871 et al. Gender-Specific Mechanism of Synaptic Impairment and Its Prevention by GCSF  
872 in a Mouse Model of ALS. *Front Cell Neurosci*. 2011;5:26.
- 873 57. Pollari E, Savchenko E, Jaronen M, Kanninen K, Malm T, Wojciechowski S, et al.  
874 Granulocyte colony stimulating factor attenuates inflammation in a mouse model of  
875 amyotrophic lateral sclerosis. *J Neuroinflammation*. 2011;8:74.
- 876 58. Amirzagar N, Nafissi S, Tafakhori A, Modabbernia A, Amirzargar A, Ghaffarpour  
877 M, et al. Granulocyte colony-stimulating factor for amyotrophic lateral sclerosis: a  
878 randomized, double-blind, placebo-controlled study of Iranian patients. *J Clin Neurol*.  
879 2015;11(2):164-71.
- 880 59. Dai XM, Ryan GR, Hapel AJ, Dominguez MG, Russell RG, Kapp S, et al.  
881 Targeted disruption of the mouse colony-stimulating factor 1 receptor gene results in  
882 osteopetrosis, mononuclear phagocyte deficiency, increased primitive progenitor cell  
883 frequencies, and reproductive defects. *Blood*. 2002;99(1):111-20.
- 884 60. Lieschke GJ, Grail D, Hodgson G, Metcalf D, Stanley E, Cheers C, et al. Mice  
885 Lacking Granulocyte-Colony-Stimulating Factor Have Chronic Neutropenia, Granulocyte

- 886 and Macrophage Progenitor-Cell Deficiency, and Impaired Neutrophil Mobilization.  
887 Blood. 1994;84(6):1737-46.
- 888 61. Biundo F, Ishiwari K, Del Prete D, D'Adamio L. Interaction of ApoE3 and ApoE4  
889 isoforms with an ITM2b/BRI2 mutation linked to the Alzheimer disease-like Danish  
890 dementia: Effects on learning and memory. Neurobiol Learn Mem. 2015;126:18-30.
- 891 62. Biundo F, Ishiwari K, Del Prete D, D'Adamio L. Deletion of the gamma-secretase  
892 subunits Aph1B/C impairs memory and worsens the deficits of knock-in mice modeling  
893 the Alzheimer-like familial Danish dementia. Oncotarget. 2016;7(11):11923-44.
- 894 63. Gulinello M, Chen F, Dobrenis K. Early deficits in motor coordination and  
895 cognitive dysfunction in a mouse model of the neurodegenerative lysosomal storage  
896 disorder, Sandhoff disease. Behav Brain Res. 2008;193(2):315-9.
- 897 64. Lehrman EK, Wilton DK, Litvina EY, Welsh CA, Chang ST, Frouin A, et al. CD47  
898 Protects Synapses from Excess Microglia-Mediated Pruning during Development.  
899 Neuron. 2018;100(1):120-34 e6.
- 900 65. Schafer DP, Lehrman EK, Heller CT, Stevens B. An engulfment assay: a protocol  
901 to assess interactions between CNS phagocytes and neurons. J Vis Exp.  
902 2014;88:51482.
- 903 66. Young K, Morrison H. Quantifying Microglia Morphology from Photomicrographs  
904 of Immunohistochemistry Prepared Tissue Using ImageJ. J Vis Exp. 2018(136).
- 905 67. Kavetsky L, Green KK, Boyle BR, Yousufzai FAK, Padron ZM, Melli SE, et al.  
906 Increased interactions and engulfment of dendrites by microglia precede Purkinje cell  
907 degeneration in a mouse model of Niemann Pick Type-C. Sci Rep. 2019;9(1):14722.
- 908

909

## 910 Supporting information

### 911 **Fig S1. Expression of genes involved in synapse removal in the cerebellum.**

912 The expression of genes encoding the C3 component of the complement cascade (C3),  
913 complement receptors (*Itgam*, *Itgax*, *Itgb2*), *Trem2*, and neuronal proteins that mediate the  
914 synaptic deposition of C1q (*Nptx1*, *Nptx2*) was analyzed by qPCR. Means  $\pm$  SEM. Data  
915 underlying this figure can be found in Table S1.

916 **Table S1. Underlying numerical data for Figures: 1A, 1B, 1D, 1E, 1F-P, 2B, 2C, 2E, 2F, 3B, 3D, 3E, 3J,**  
917 **3L, 4B, 4D, 4E, 4G, 4H, 5B, 5C, 6C-E, 6H-J, 7B-D, 7H and S1.**

918 **Table S2. Summary of Subjects Analyzed for CSF3 expression.**

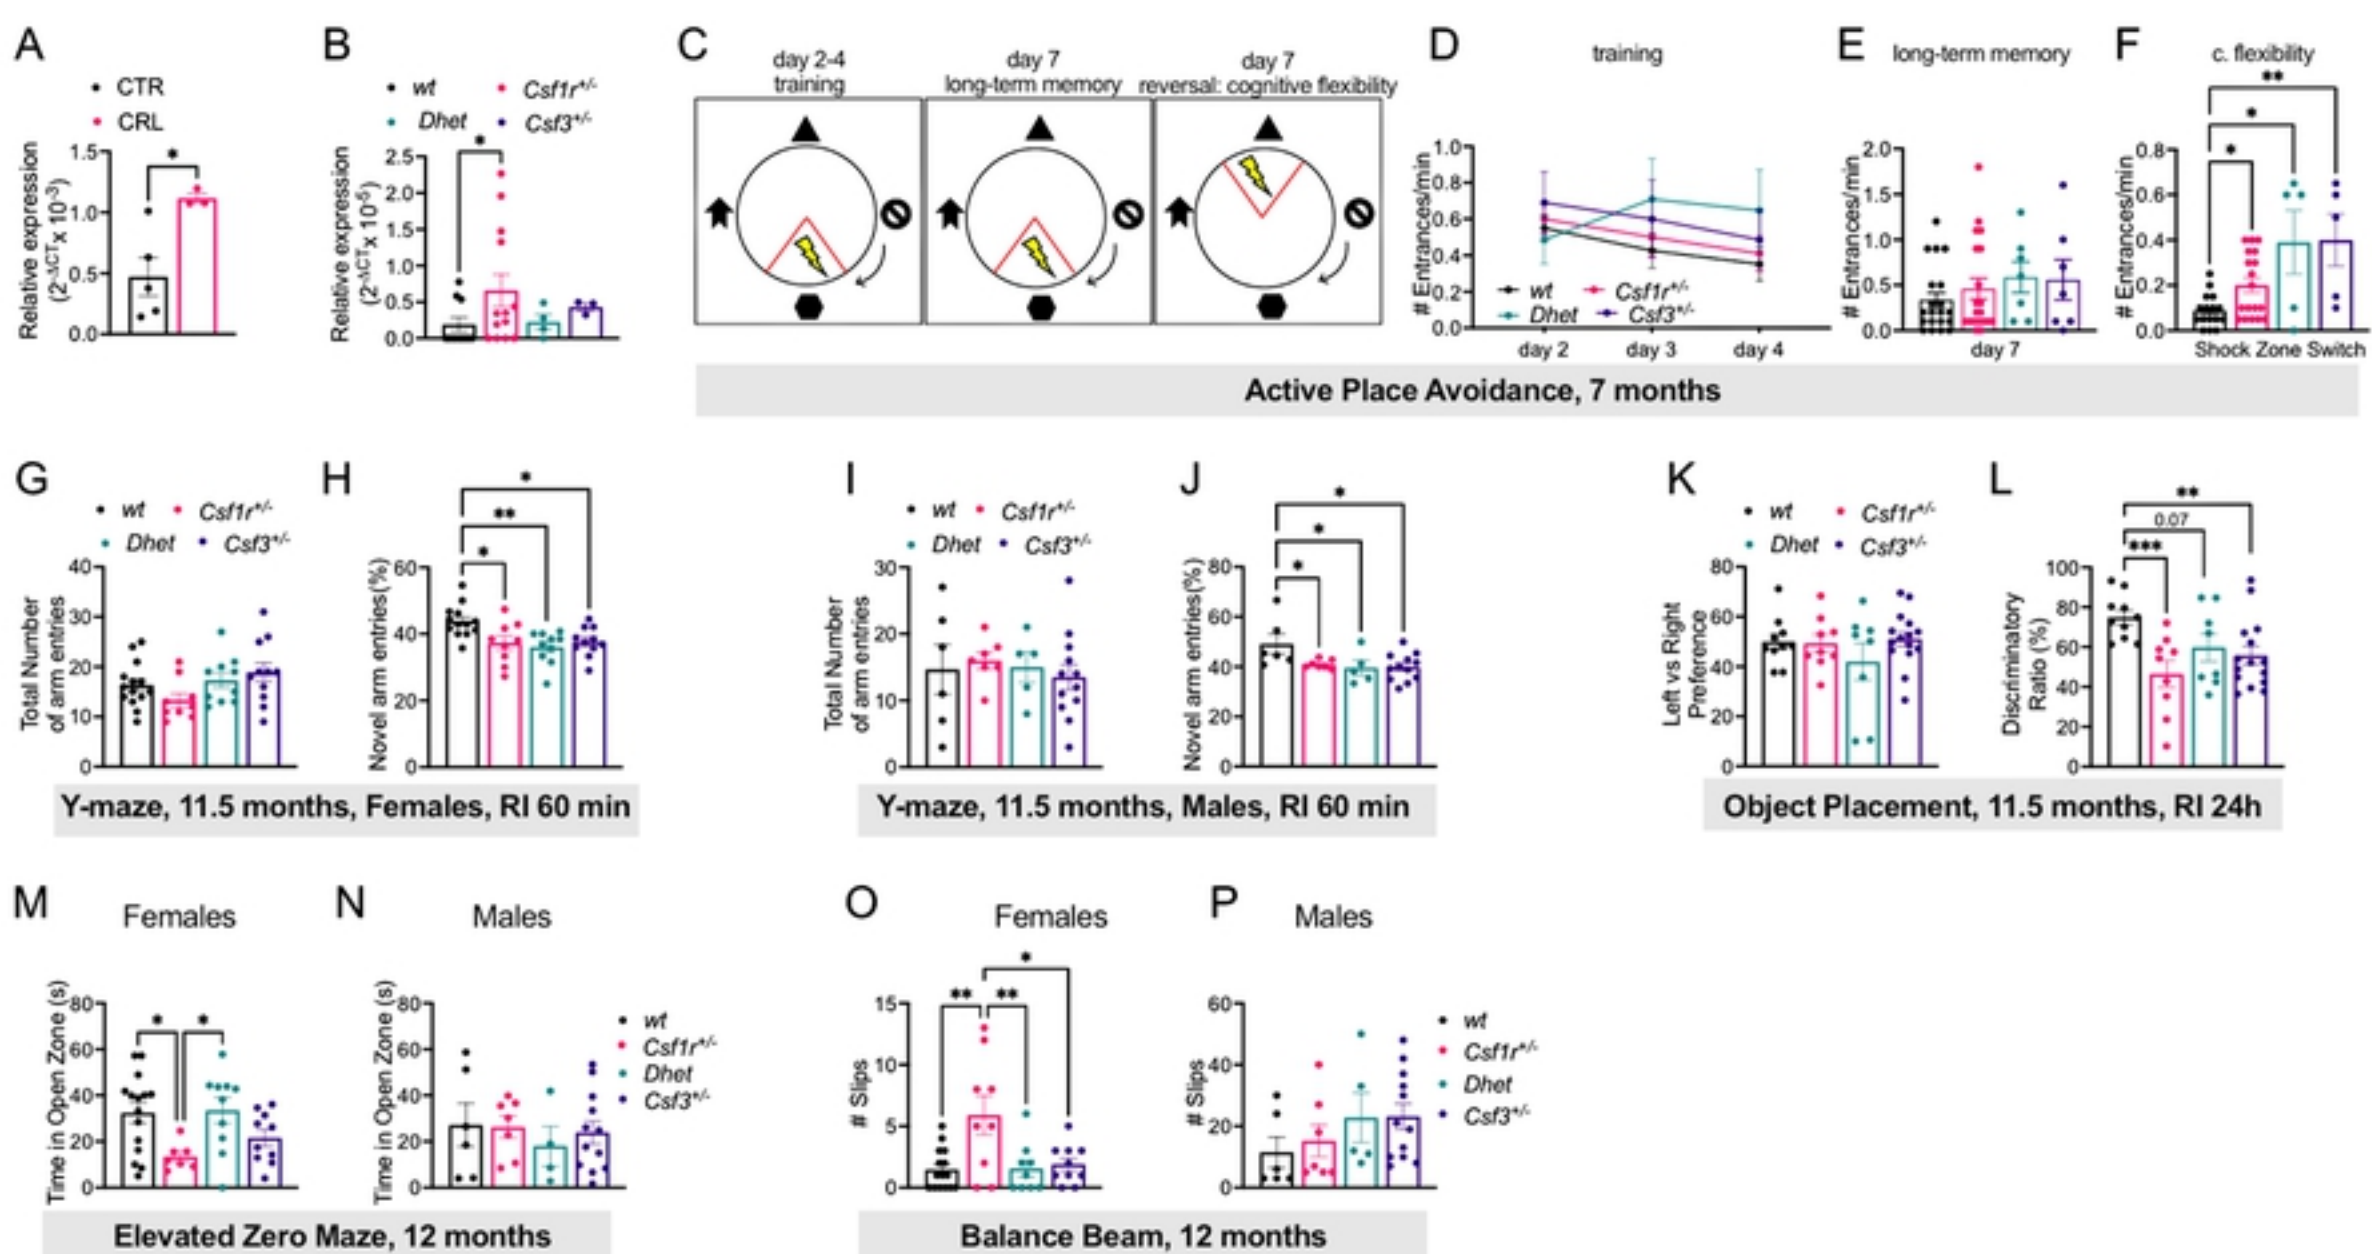



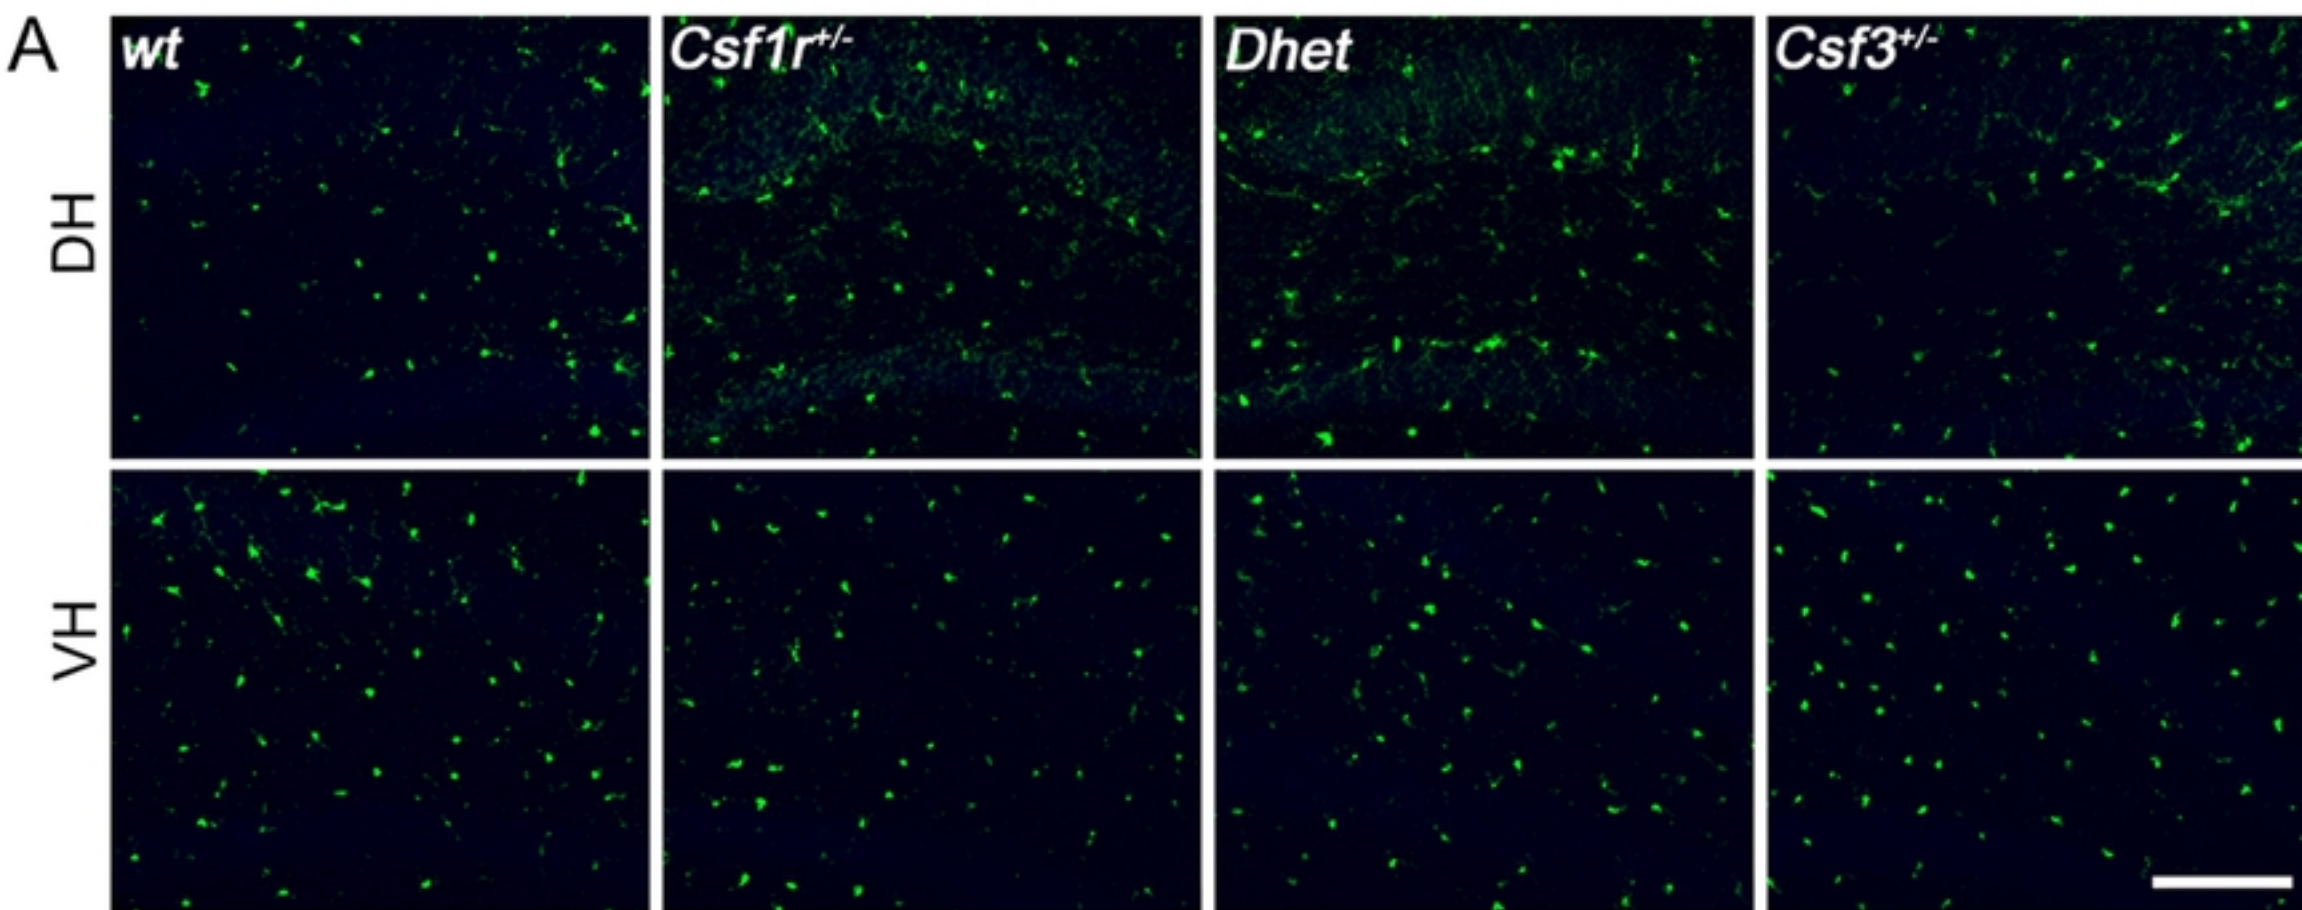

Iba1 DAPI

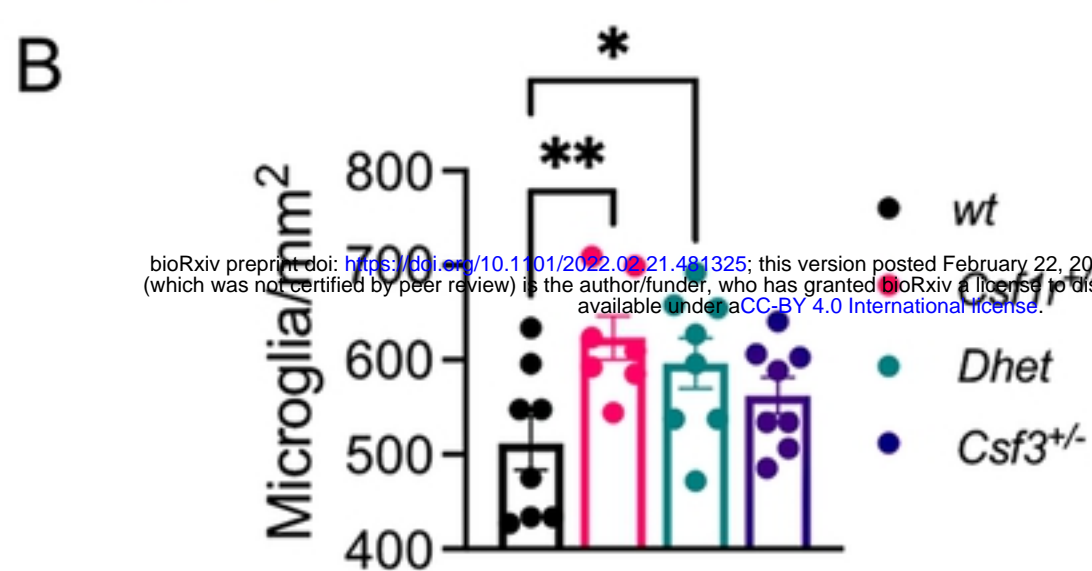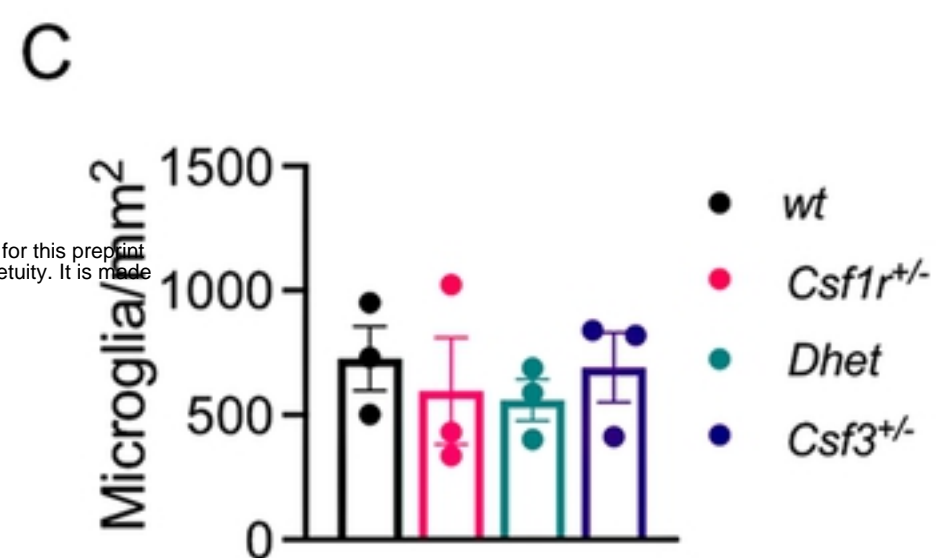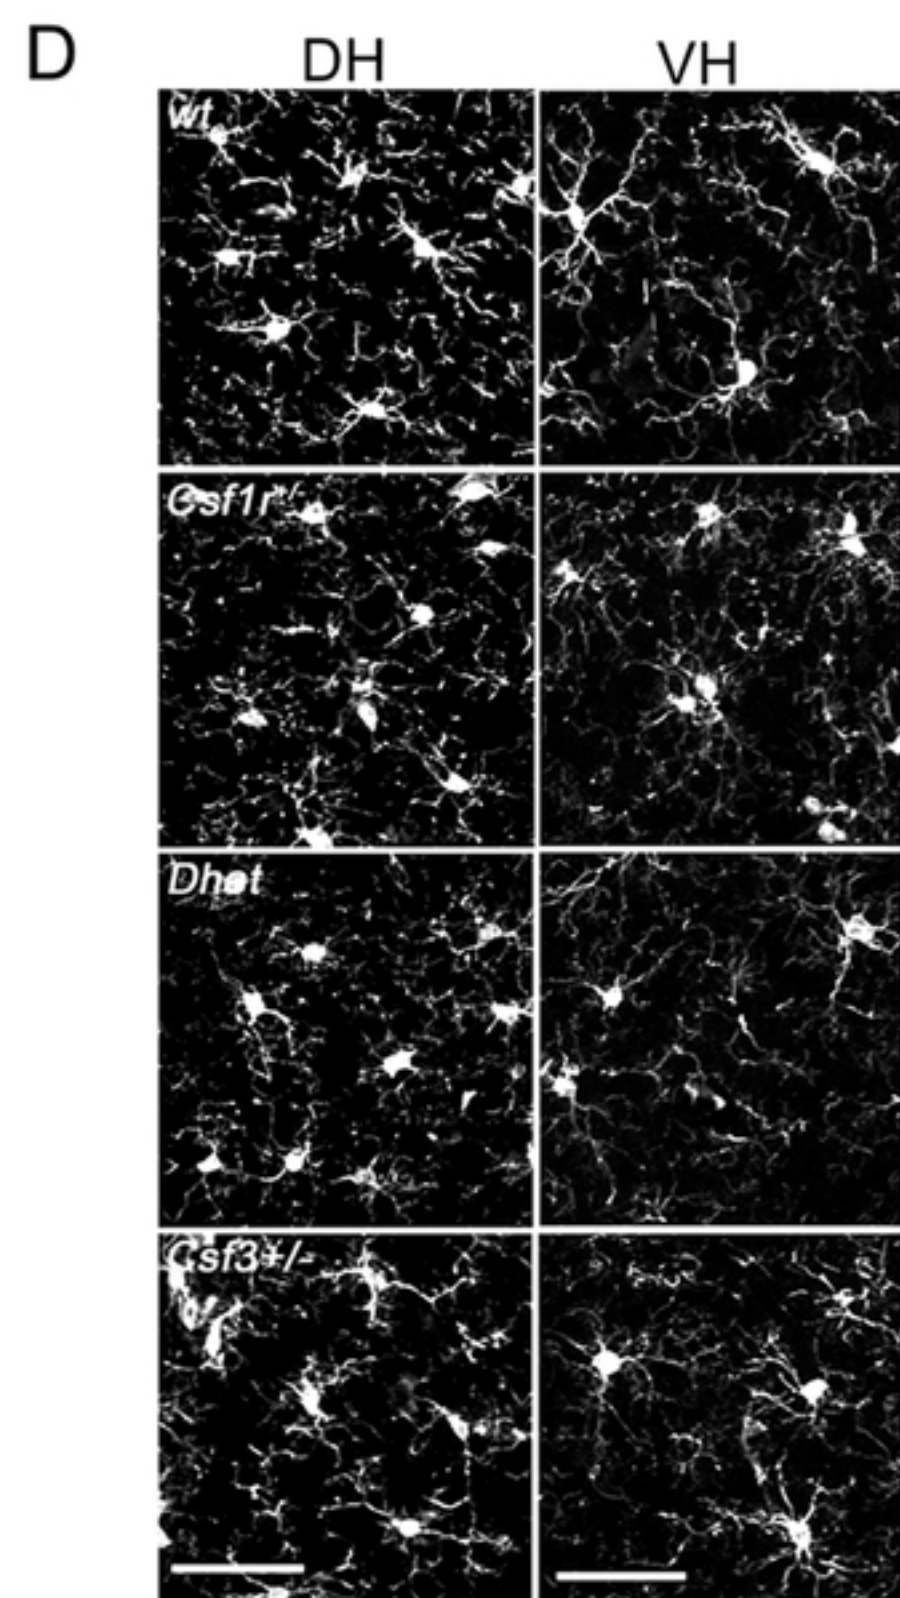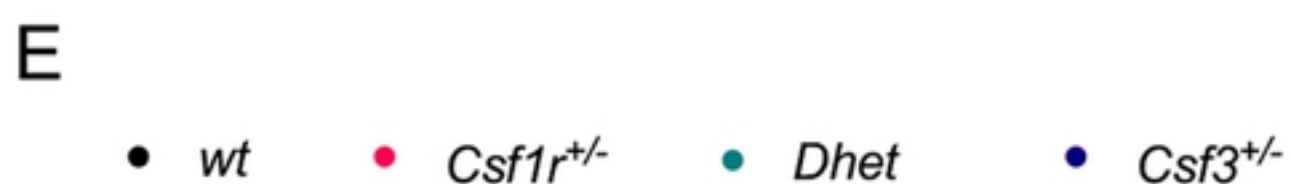

Dorsal hippocampus

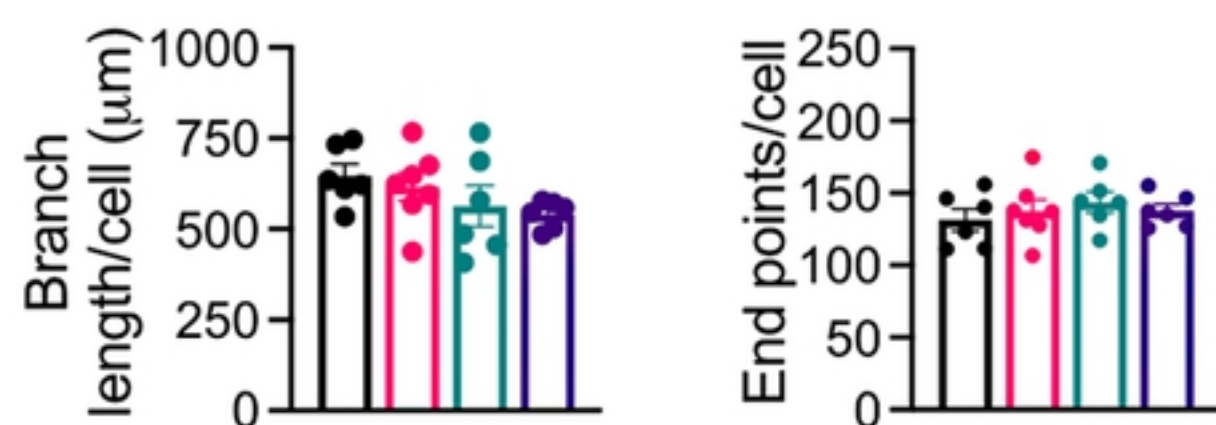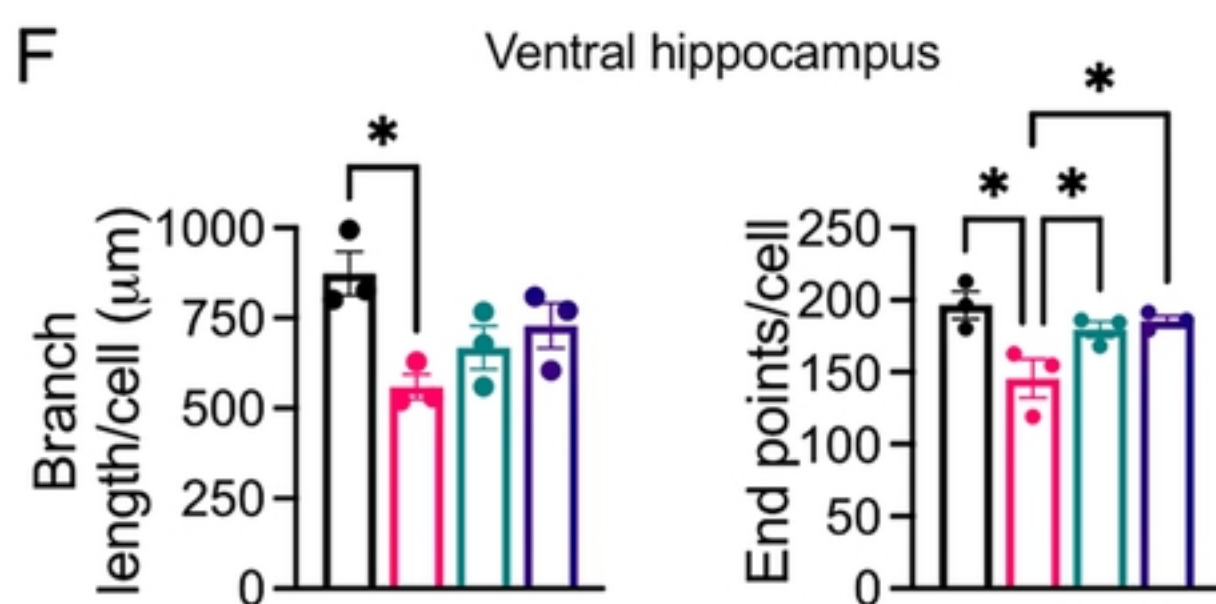



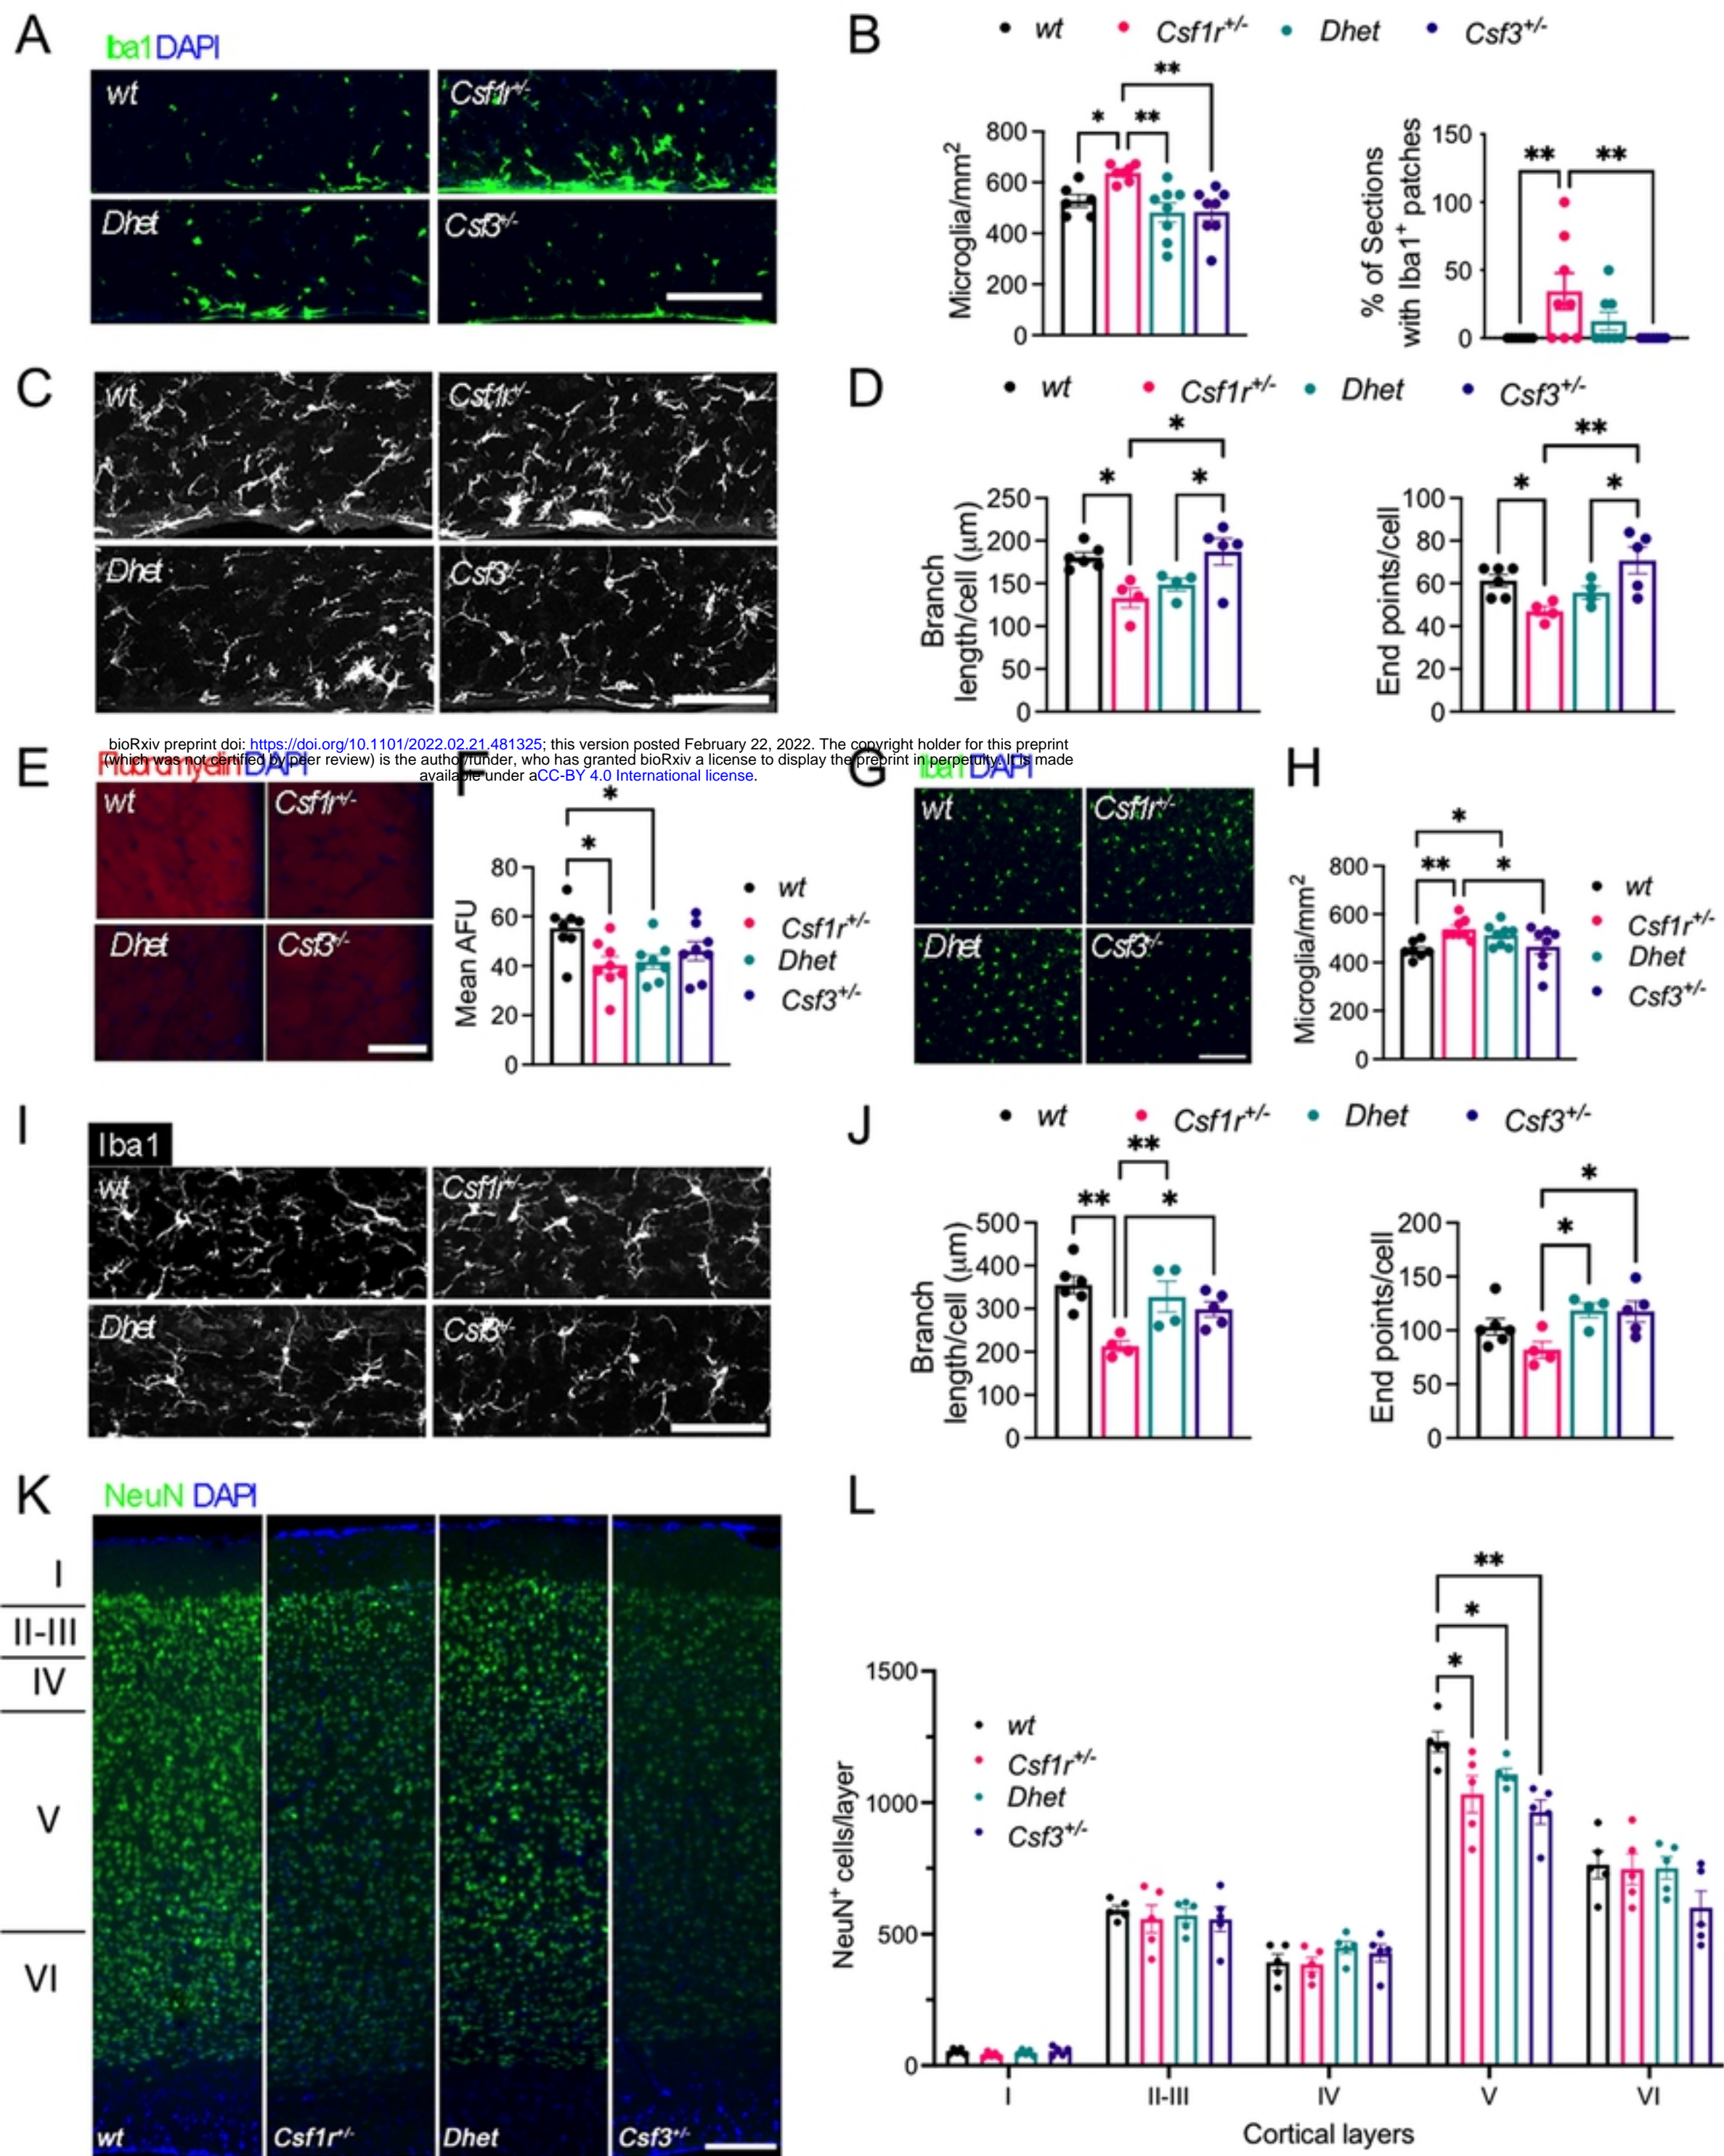



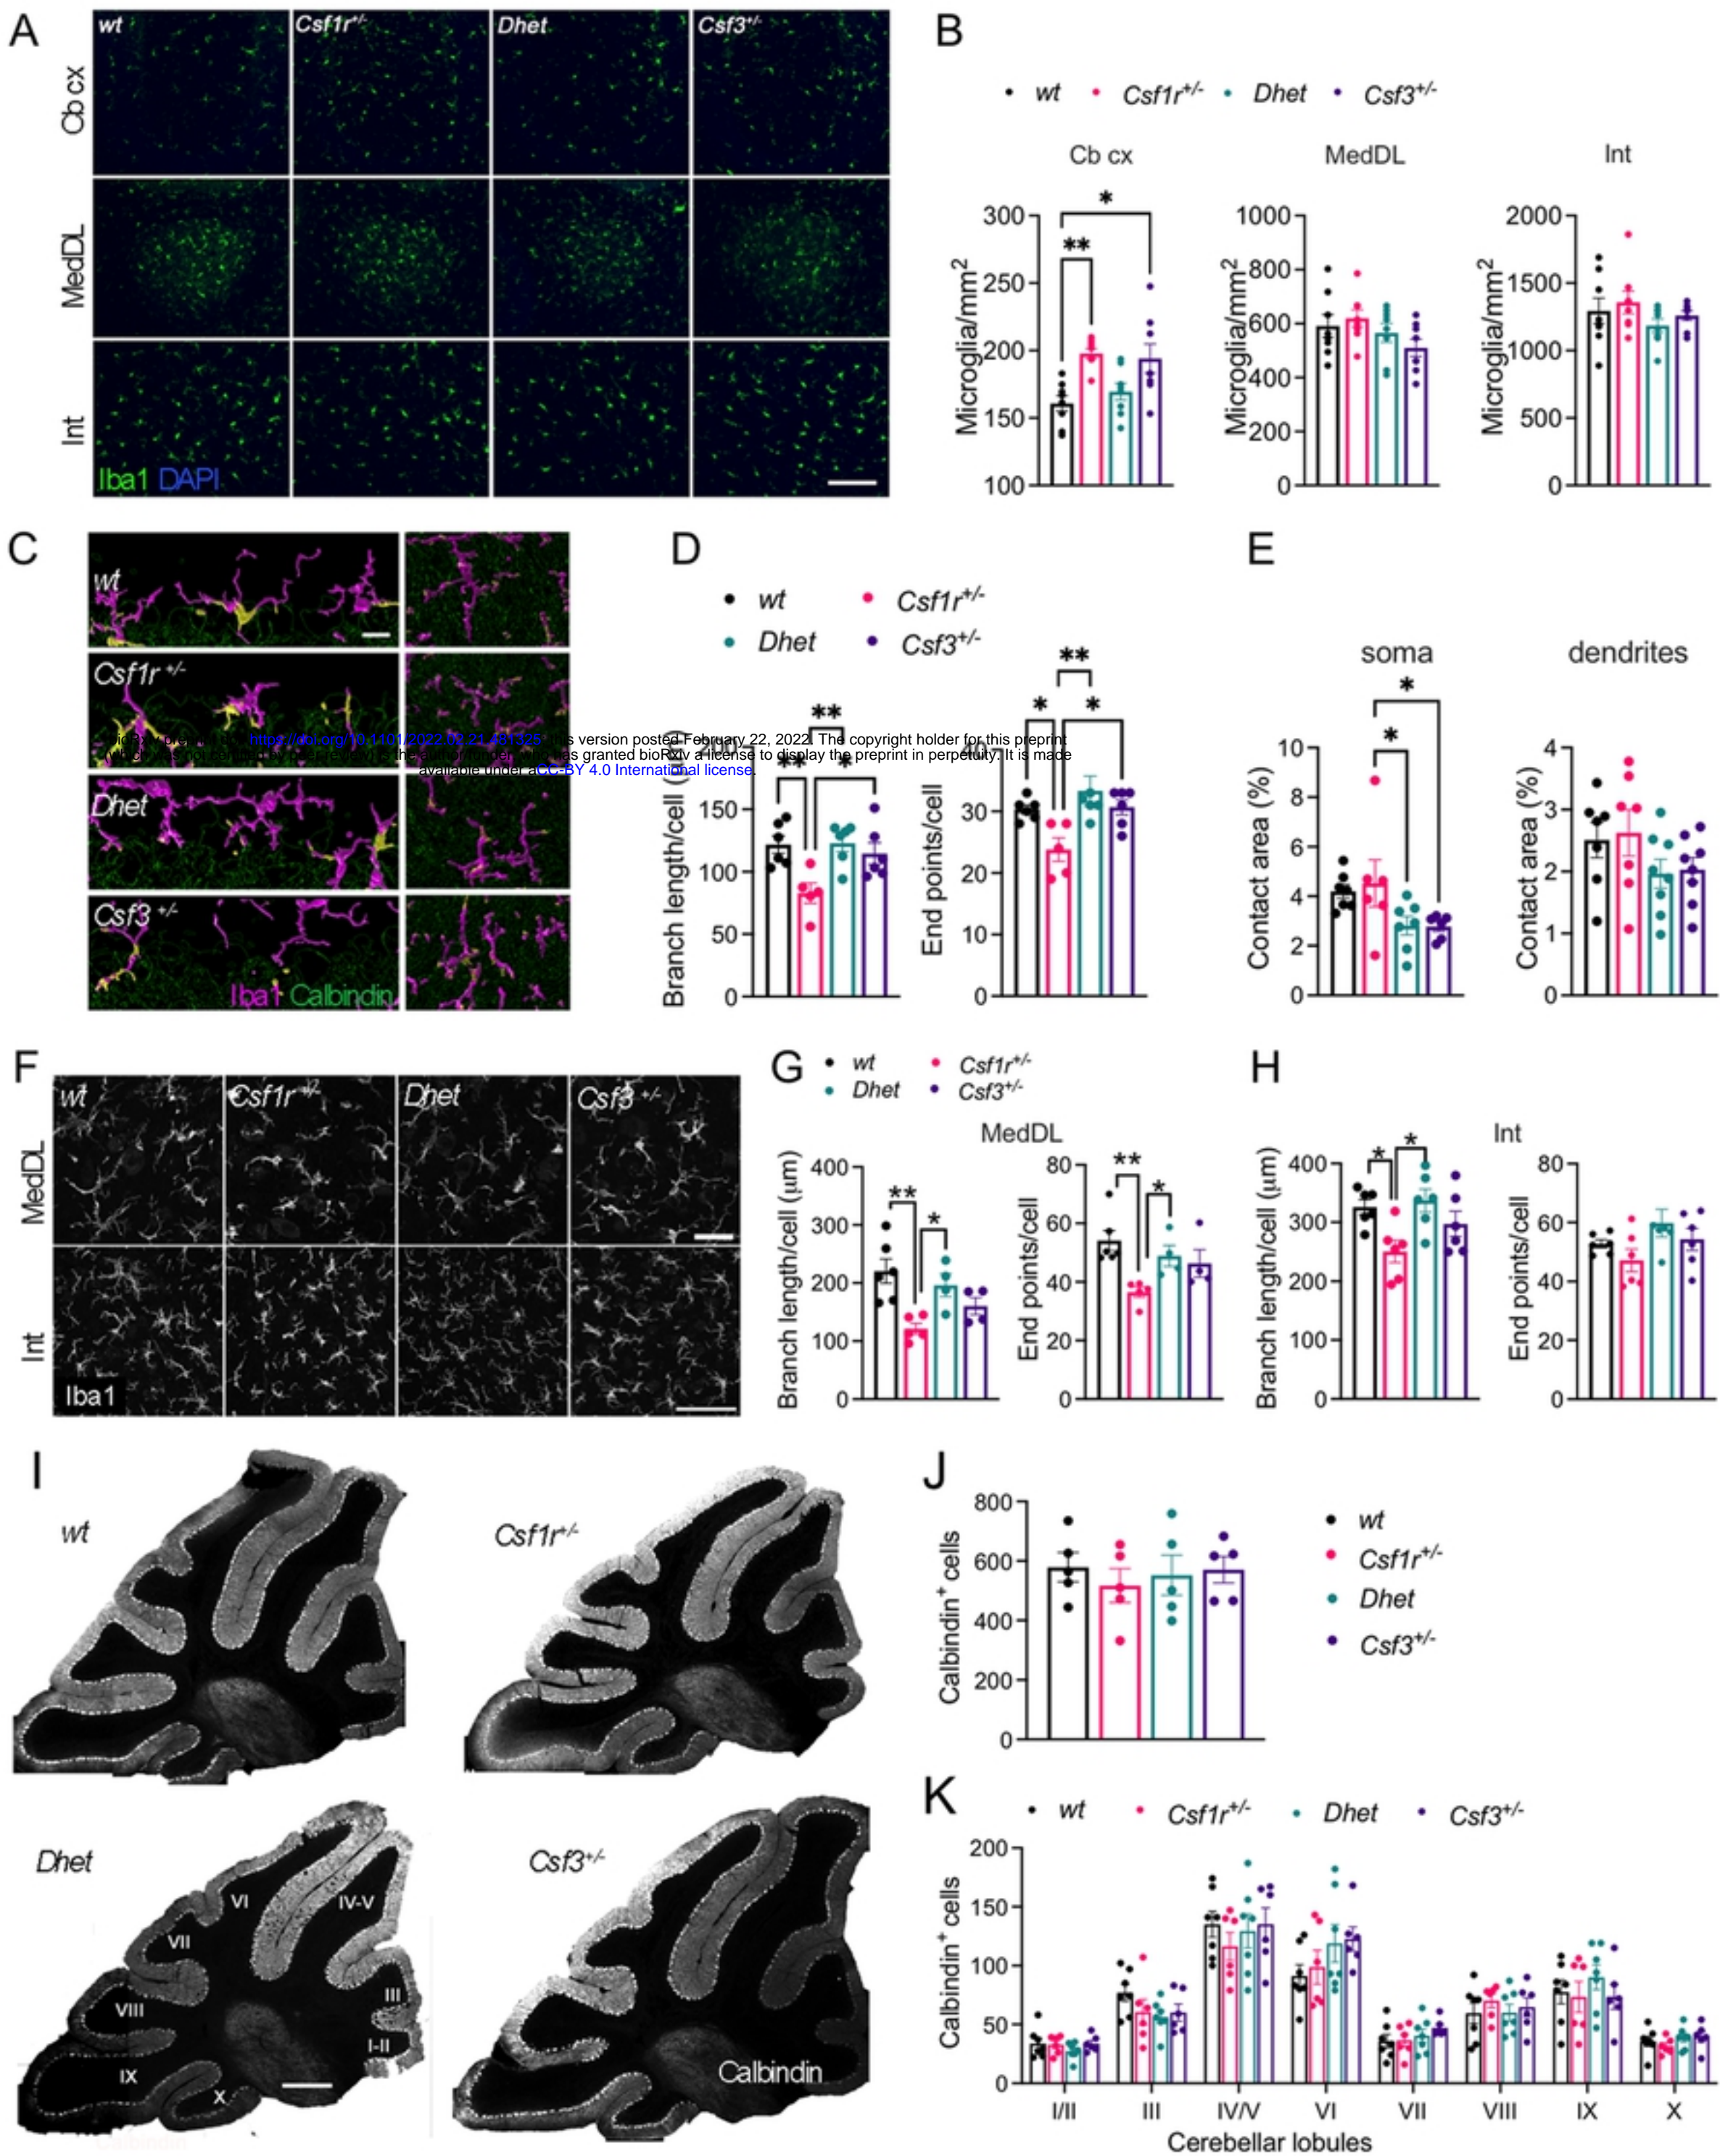



A

Social Preference

bioRxiv preprint doi: <https://doi.org/10.1101/2022.02.21.481325>; this version posted February 22, 2022. The copyright holder for this preprint (which was not certified by peer review) is the author/funder, who has granted bioRxiv a license to display the preprint in perpetuity. It is made available under aCC-BY 4.0 International license.

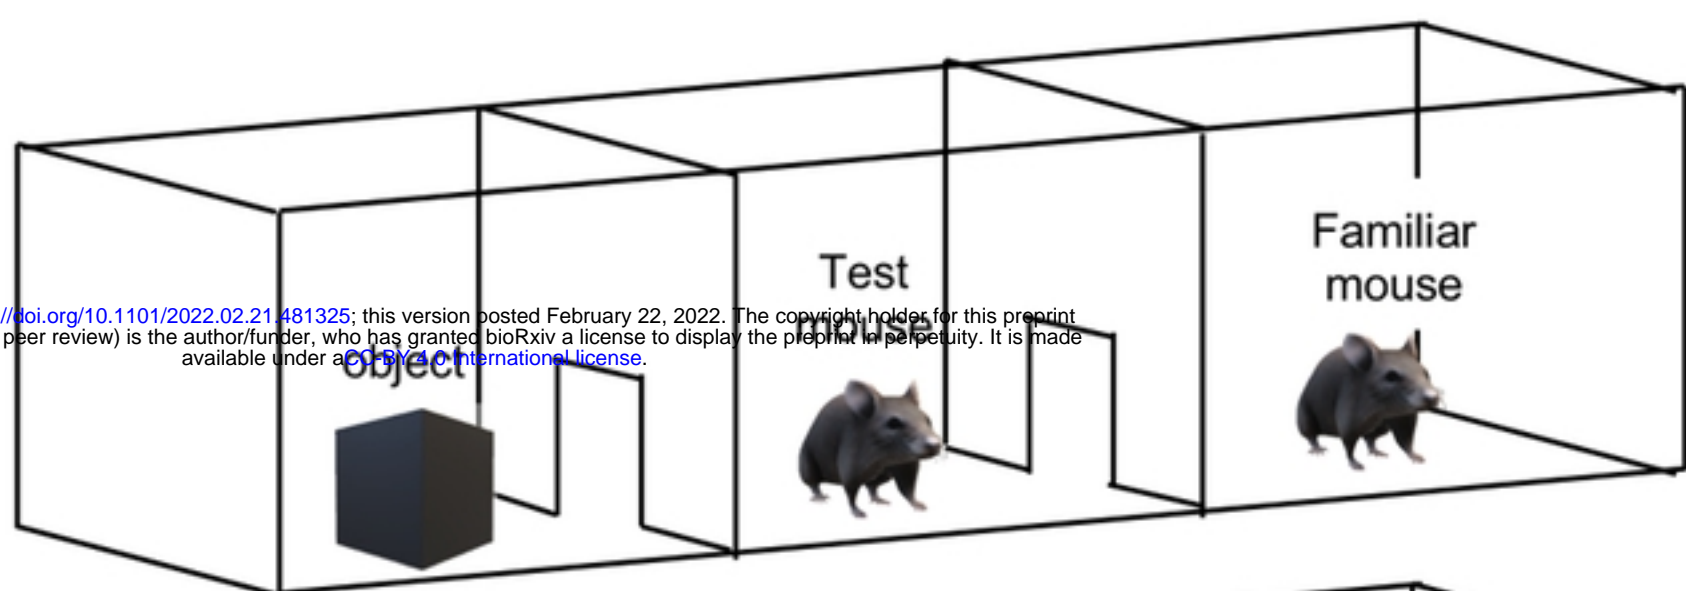

Social Novelty

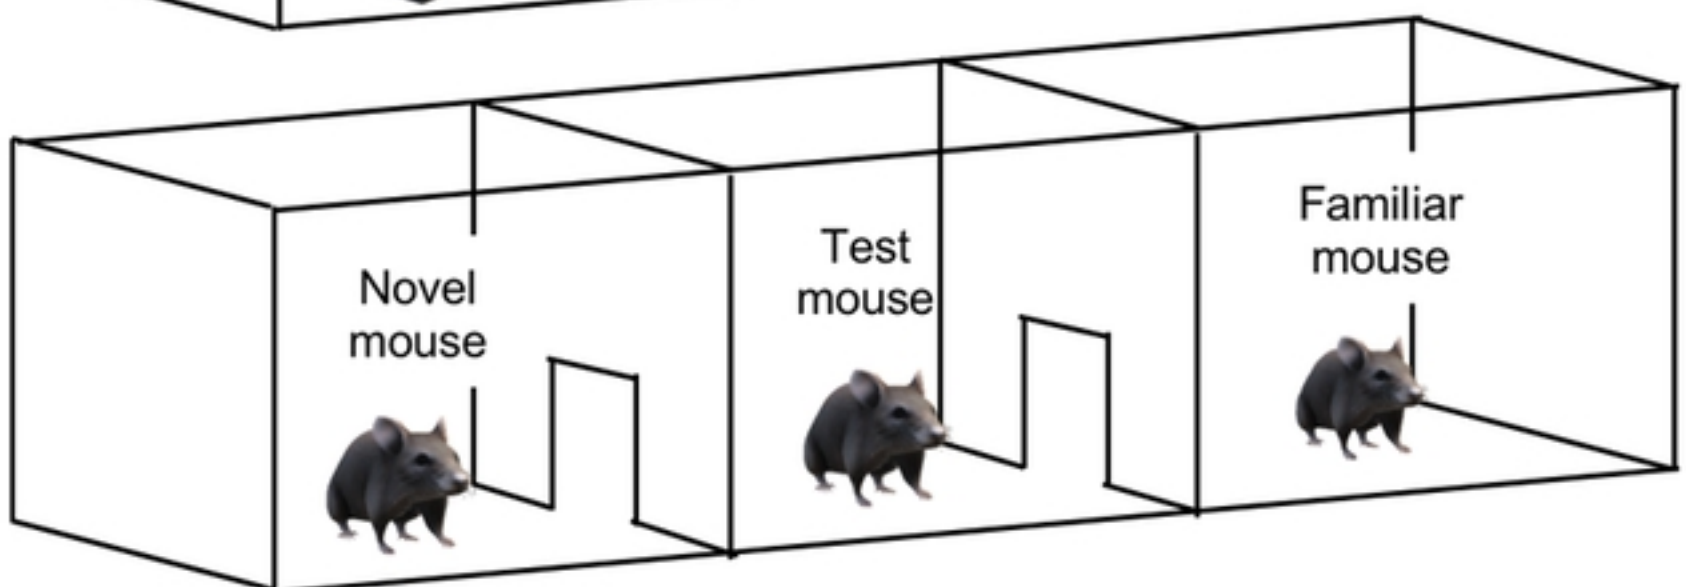

B

Social Preference

C

Social Novelty

• *wt* • *Csf1r<sup>+/-</sup>* • *Dhet* • *Csf3<sup>+/-</sup>*

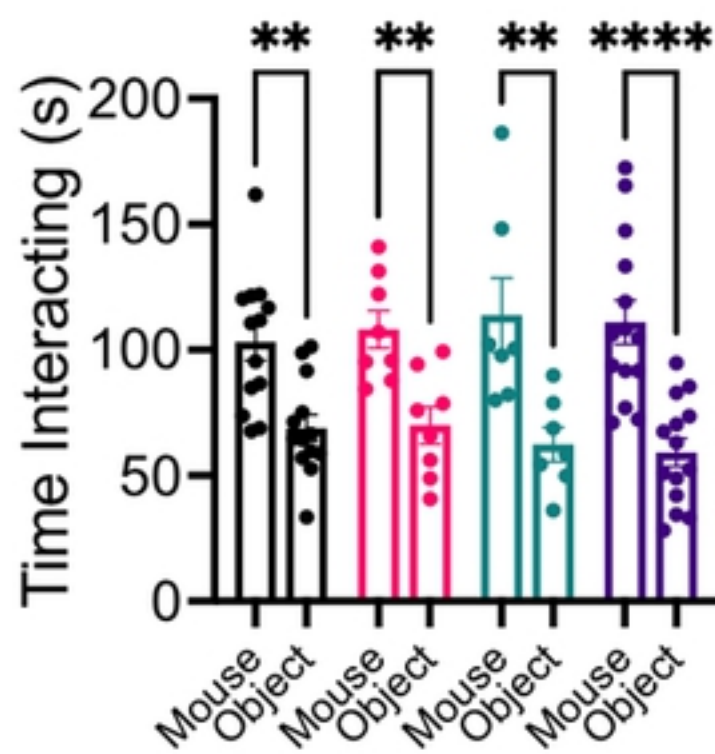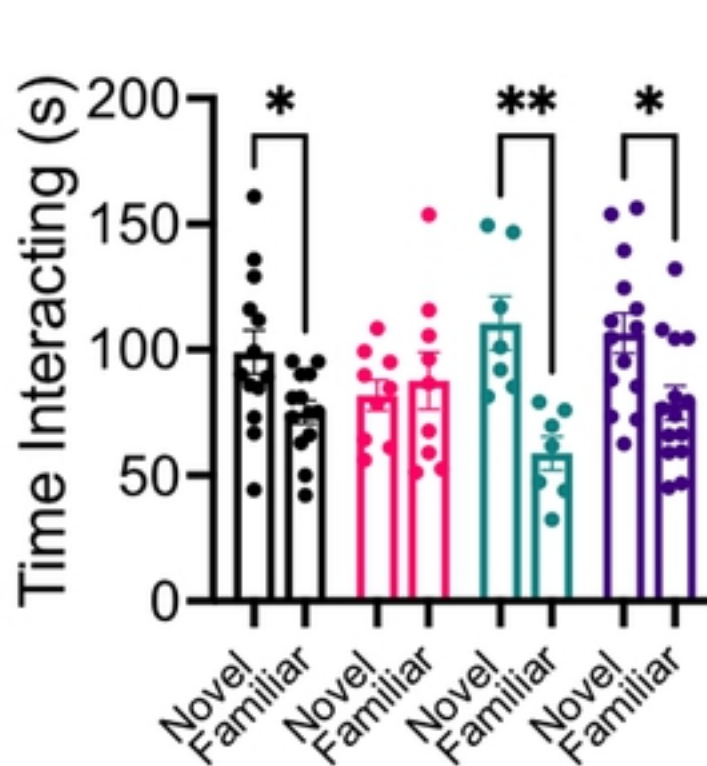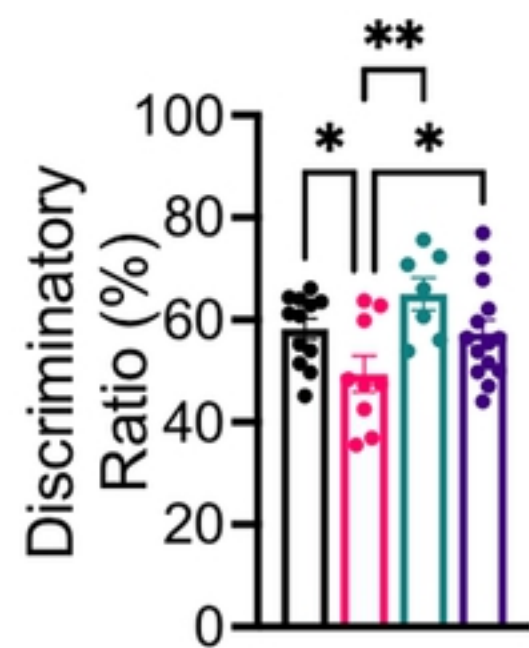

Manuscript

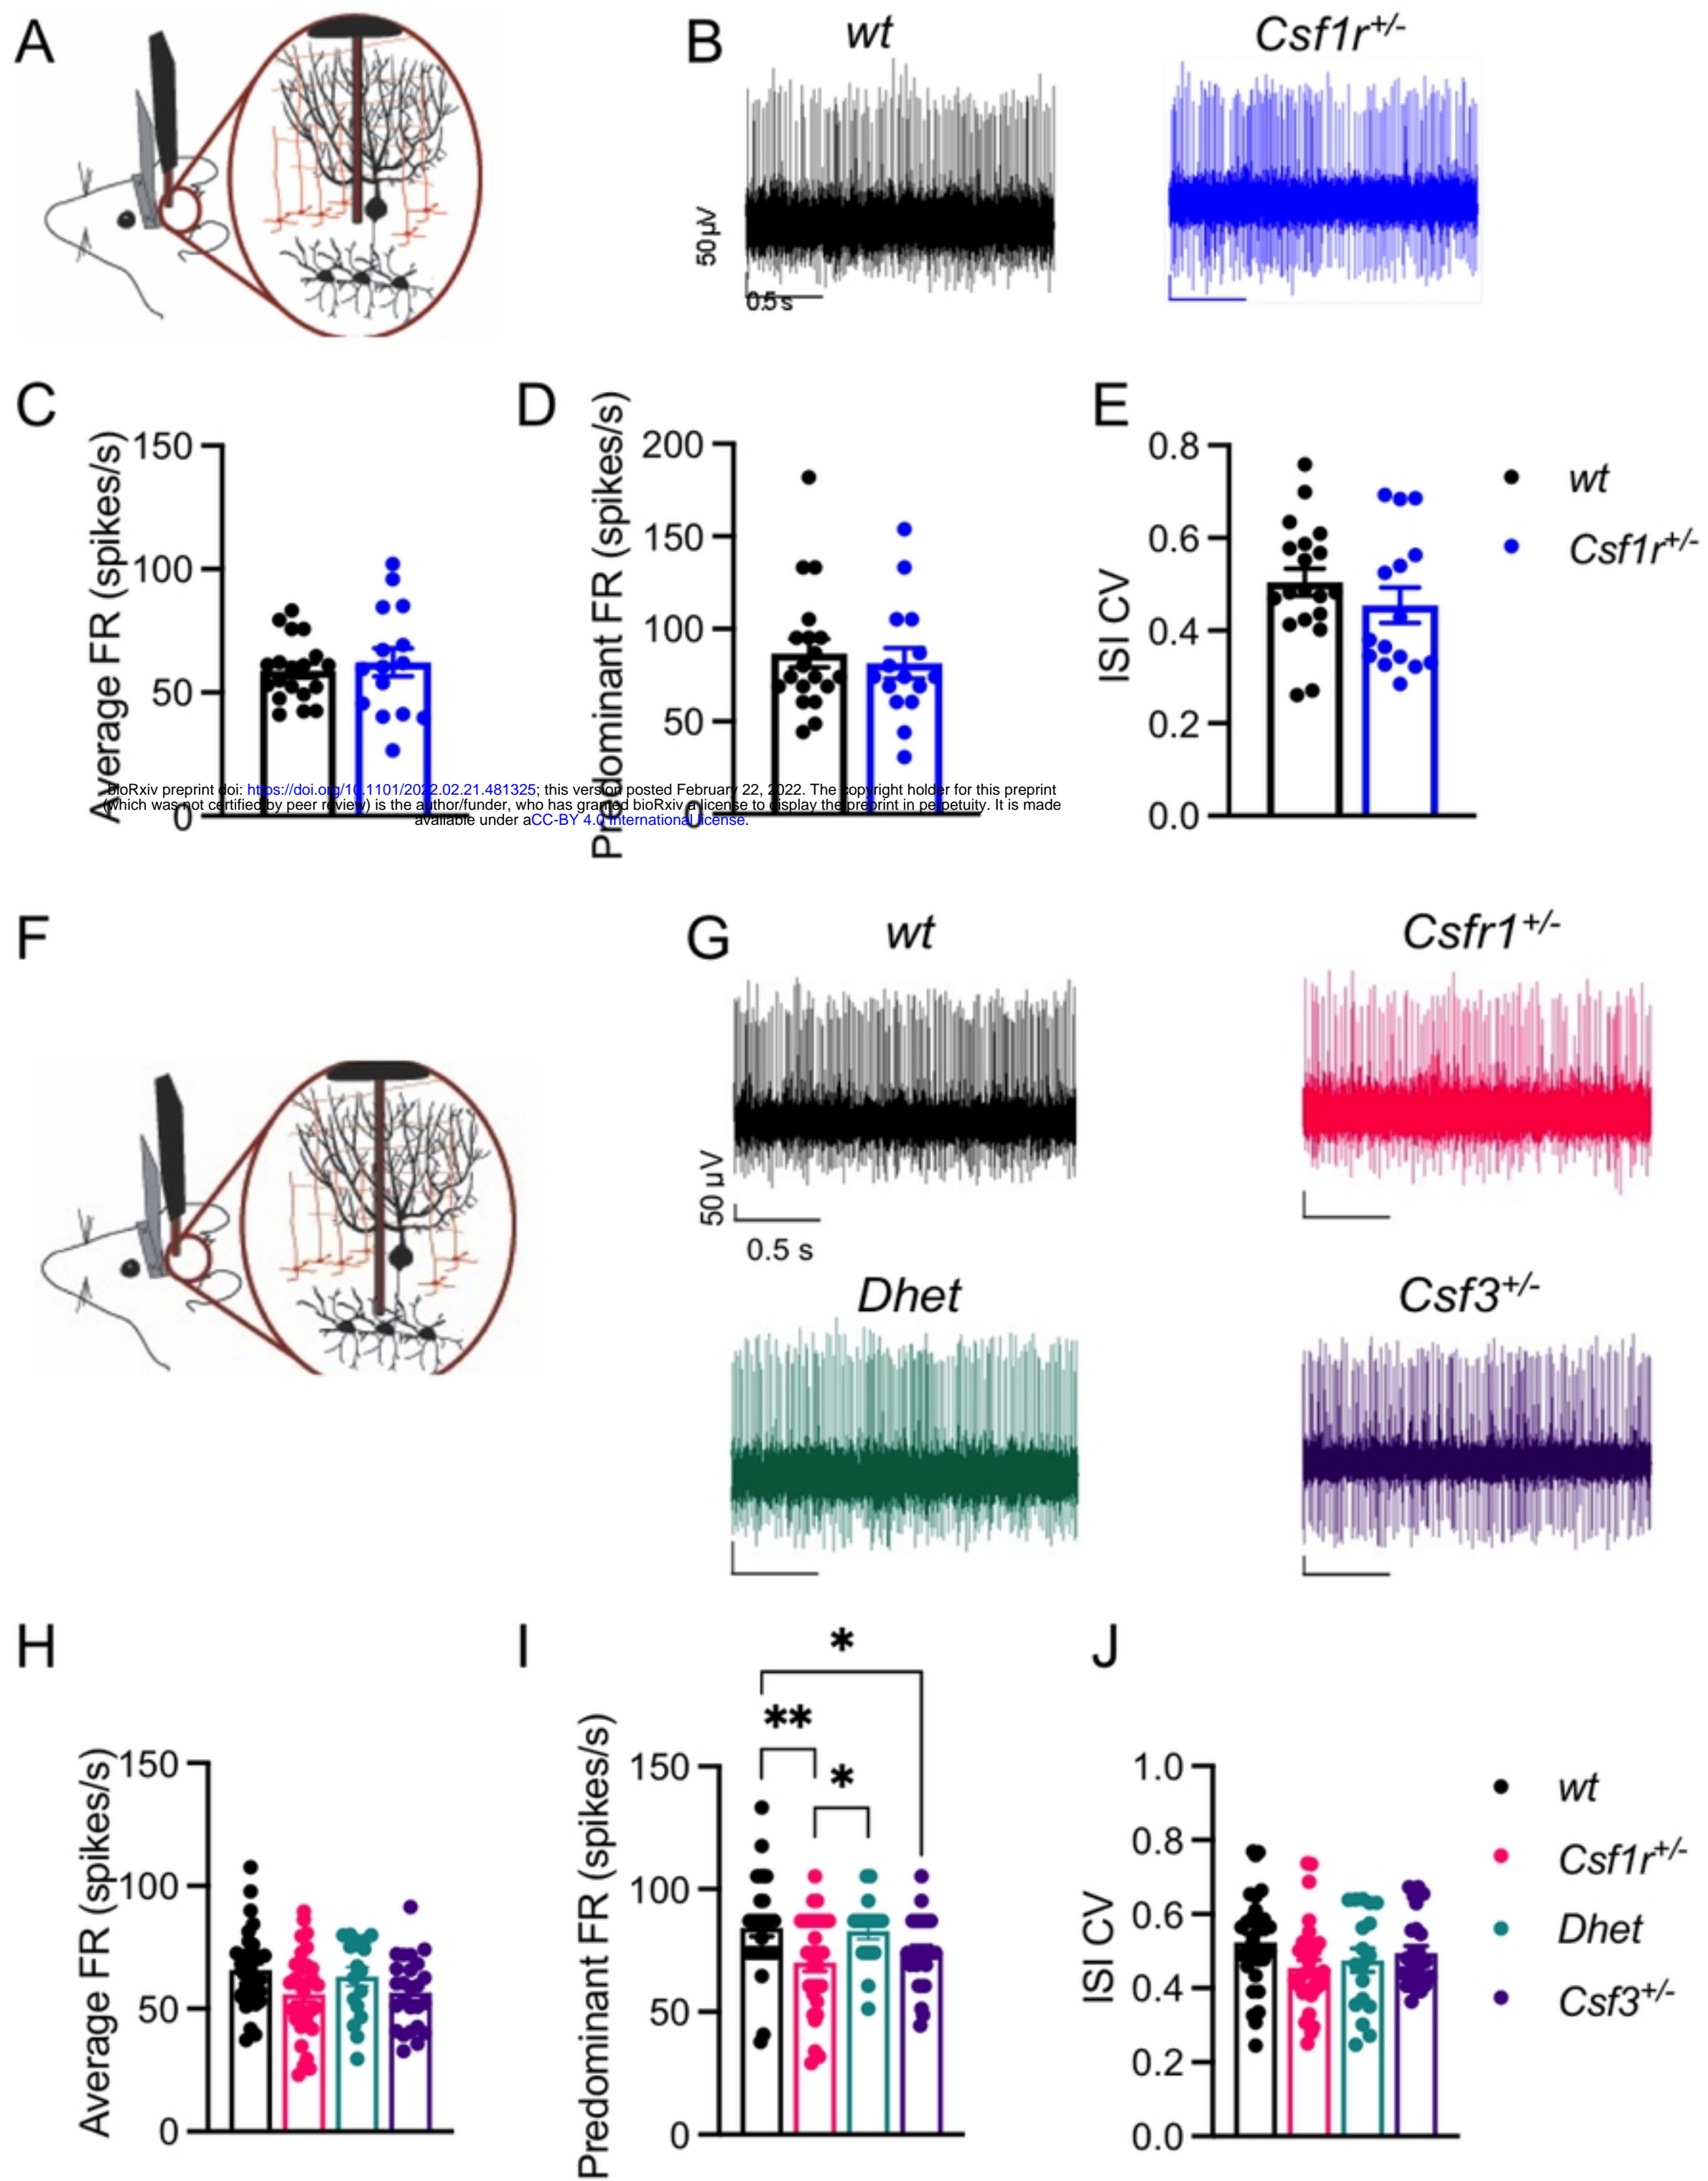



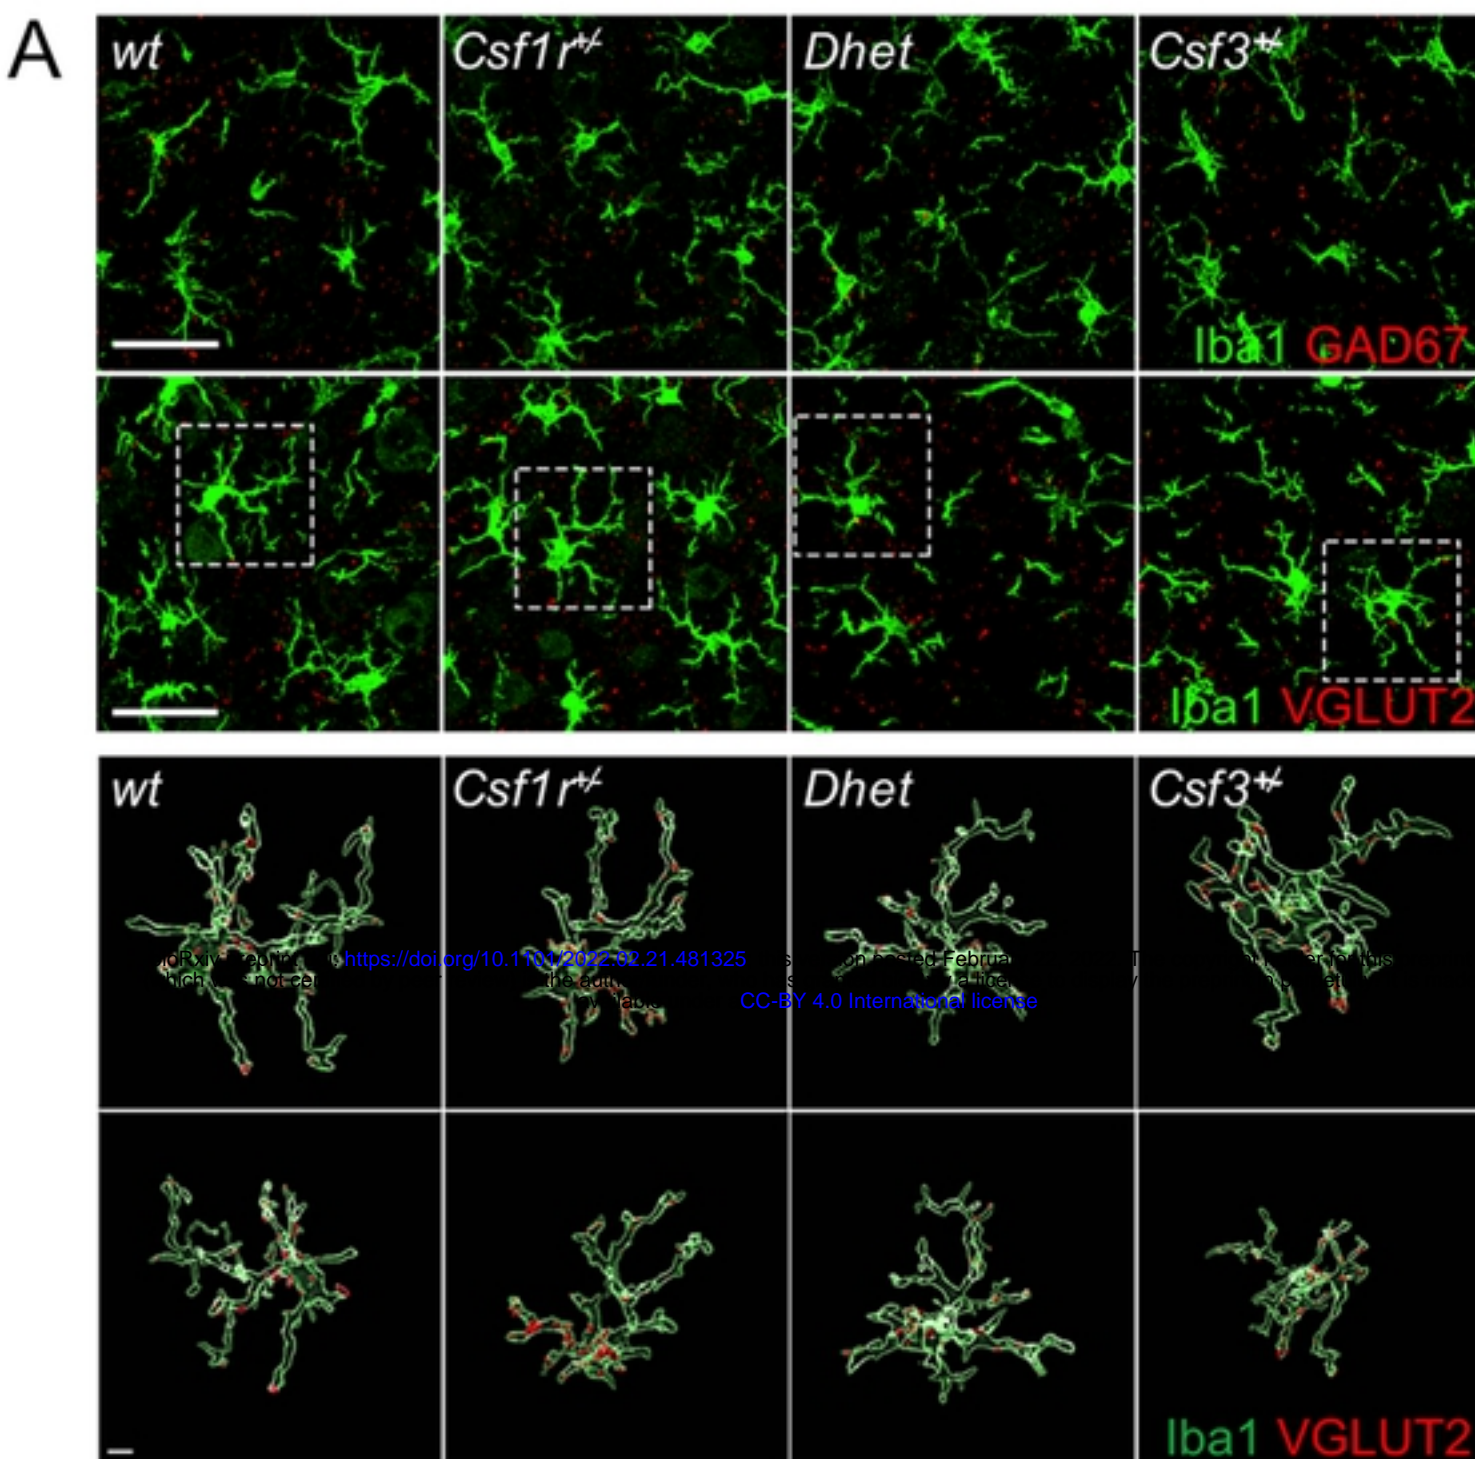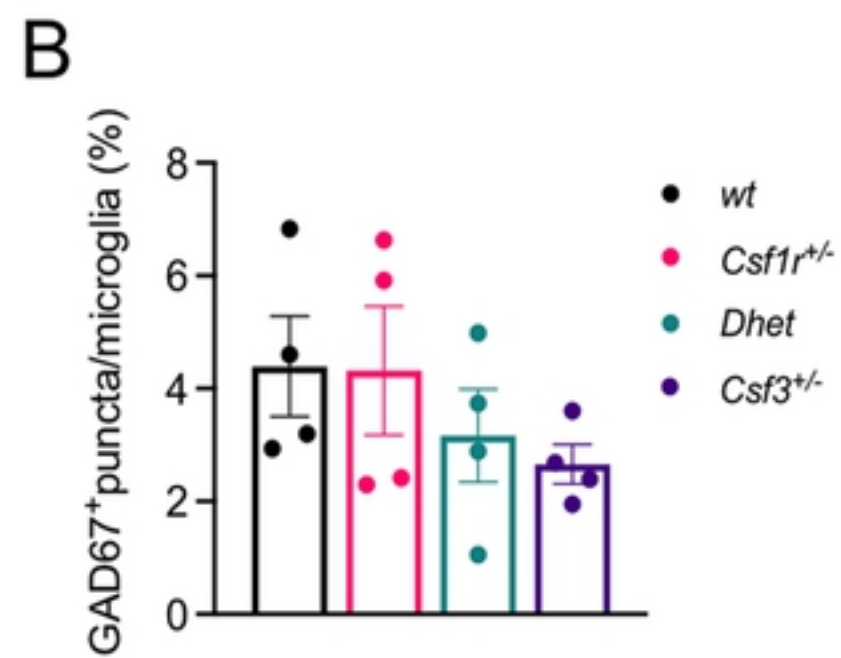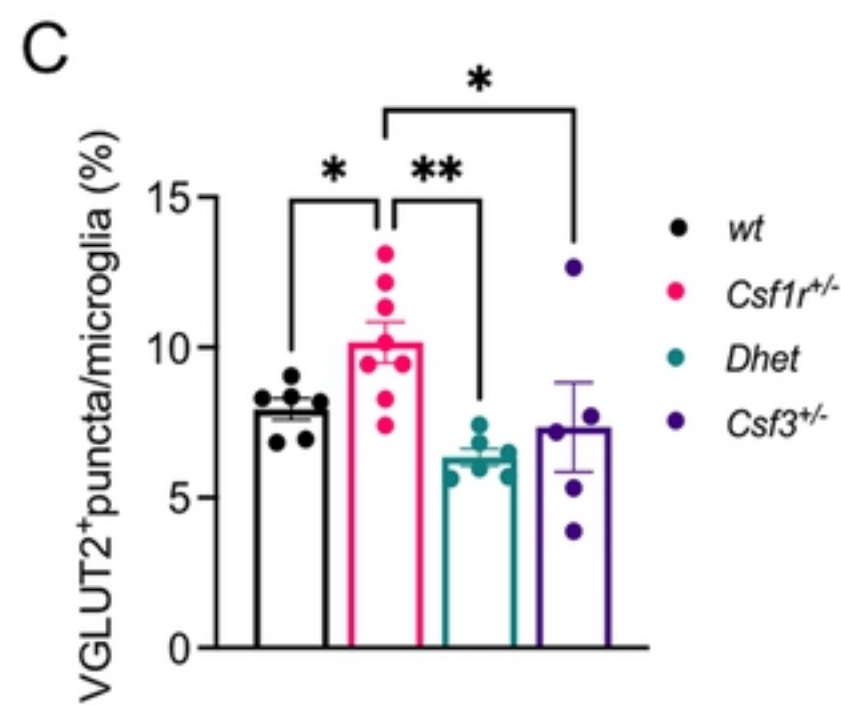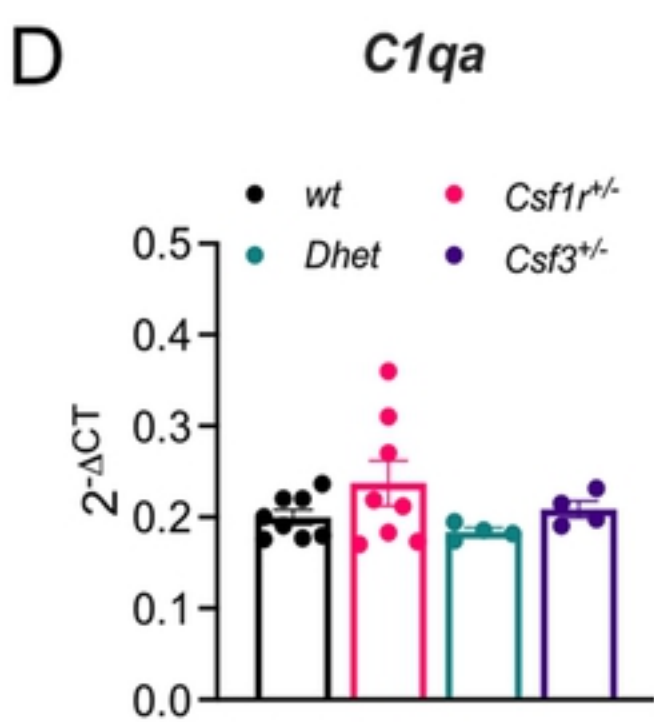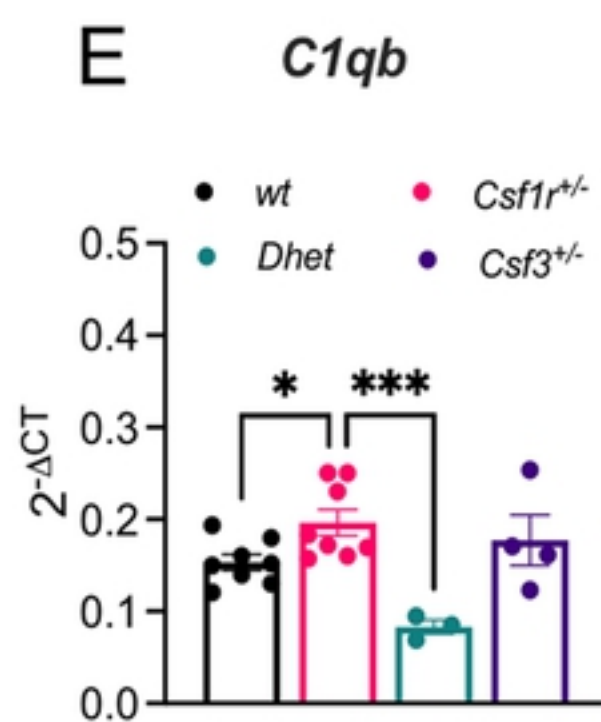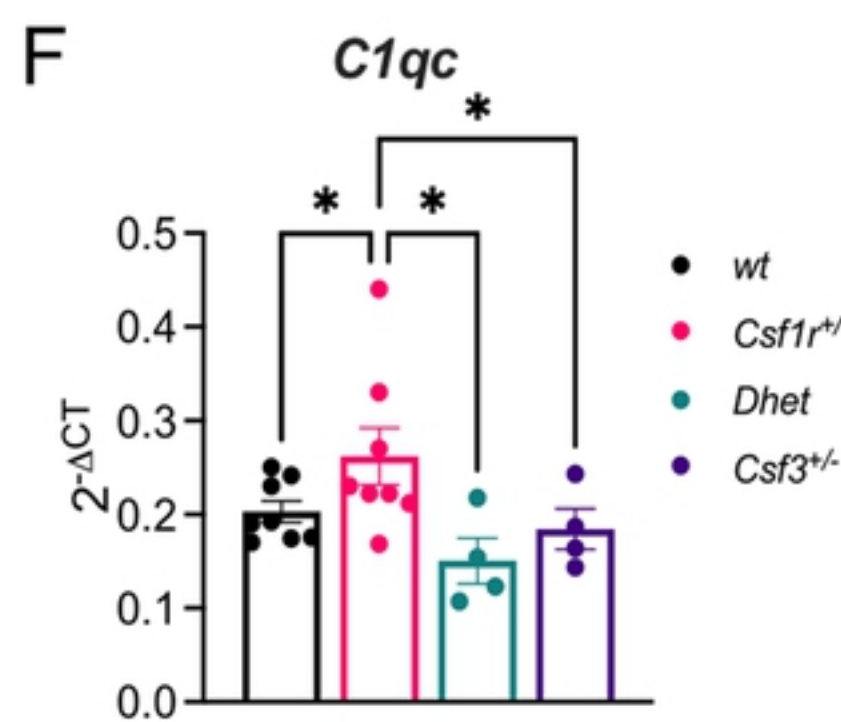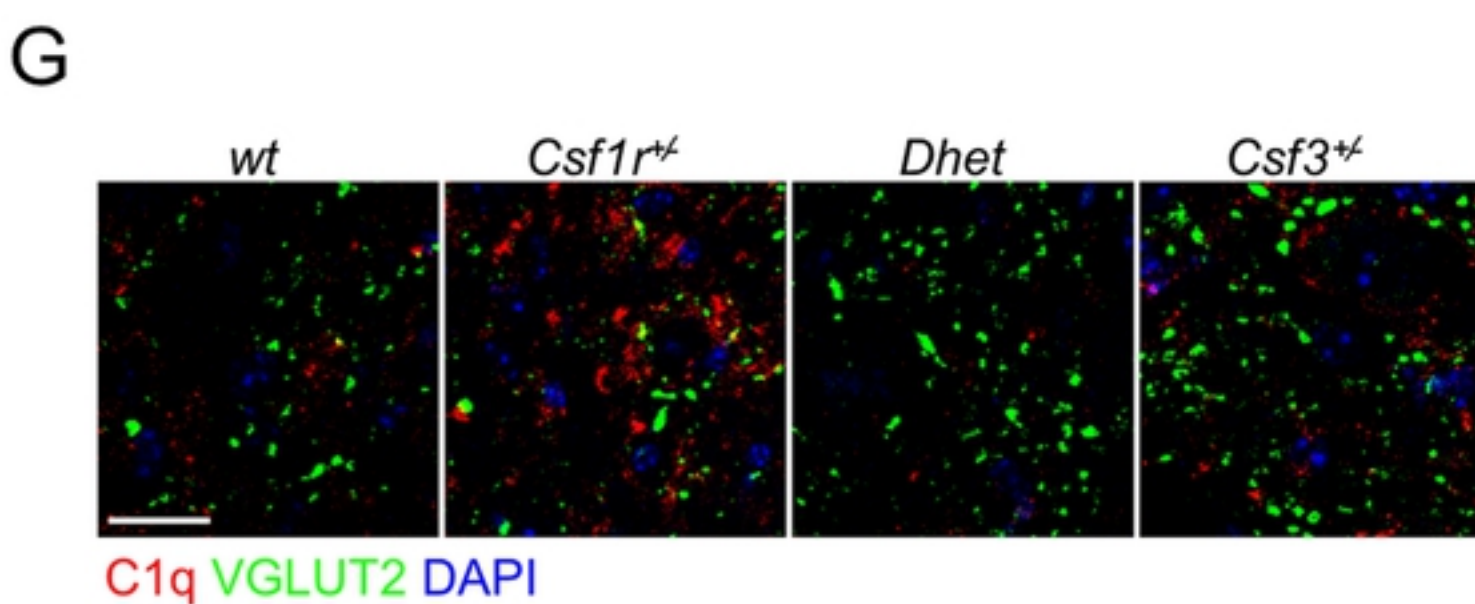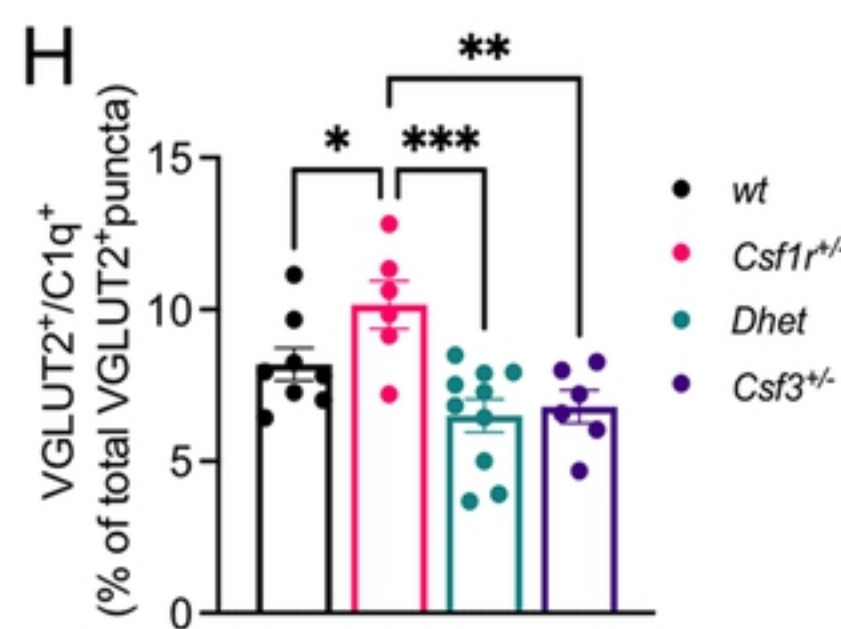

Source: https://www.biorxiv.org/content/10.1101/2022.02.21.481325v1.full.pdf
